# Supplementary material for: Mitochondrial genome evolution and tRNA truncation in Acariformes mites: new evidence from eriophyoid mites
Source: PubMed Central journal article supplement (PMC4702108; doi:10.1038/srep18920), 2016-01-06
Supplement: srep18920-s1.pdf [file srep18920-s1.pdf]

**Mitochondrial genome evolution and tRNA truncation in Acariformes mites:  
new evidence from eriophyoid mites**

Xiao-Feng Xue<sup>1,2</sup>, Jing-Feng Guo<sup>1</sup>, Yan Dong<sup>1</sup>, Xiao-Yue Hong<sup>1</sup> & Renfu Shao<sup>2</sup>

<sup>1</sup>Department of Entomology, Nanjing Agricultural University, Nanjing, Jiangsu  
210095, China, <sup>2</sup>GeneCology Research Centre, Faculty of Science, Health, Education  
and Engineering, University of the Sunshine Coast, Maroochydore, Queensland 4556,  
Australia.

Correspondence and requests for materials should be addressed to X.-F. X.

([xfxue@njau.edu.cn](mailto:xfxue@njau.edu.cn)) and R.S. ([rshao@usc.edu.au](mailto:rshao@usc.edu.au))

Corresponding author: Tel.: +86 25 84395868

**Supplementary Figure S1.** Maximum likelihood credibility trees inferred with: A) nucleotide sequences by 16 partitions; B) nucleotide sequences by 6 partitions; C) nucleotide sequences by 16 partitions excluding the third codon positions of PCGs; D) nucleotide sequences by 6 partitions excluding the third positions of the PCGs; E) amino acid sequences partitioned by 13 genes; and F) nucleotide sequences of PCGs of 86 taxa by 13 partitions. Maximum likelihood bootstrap proportions (BSPs) are indicated at each node.

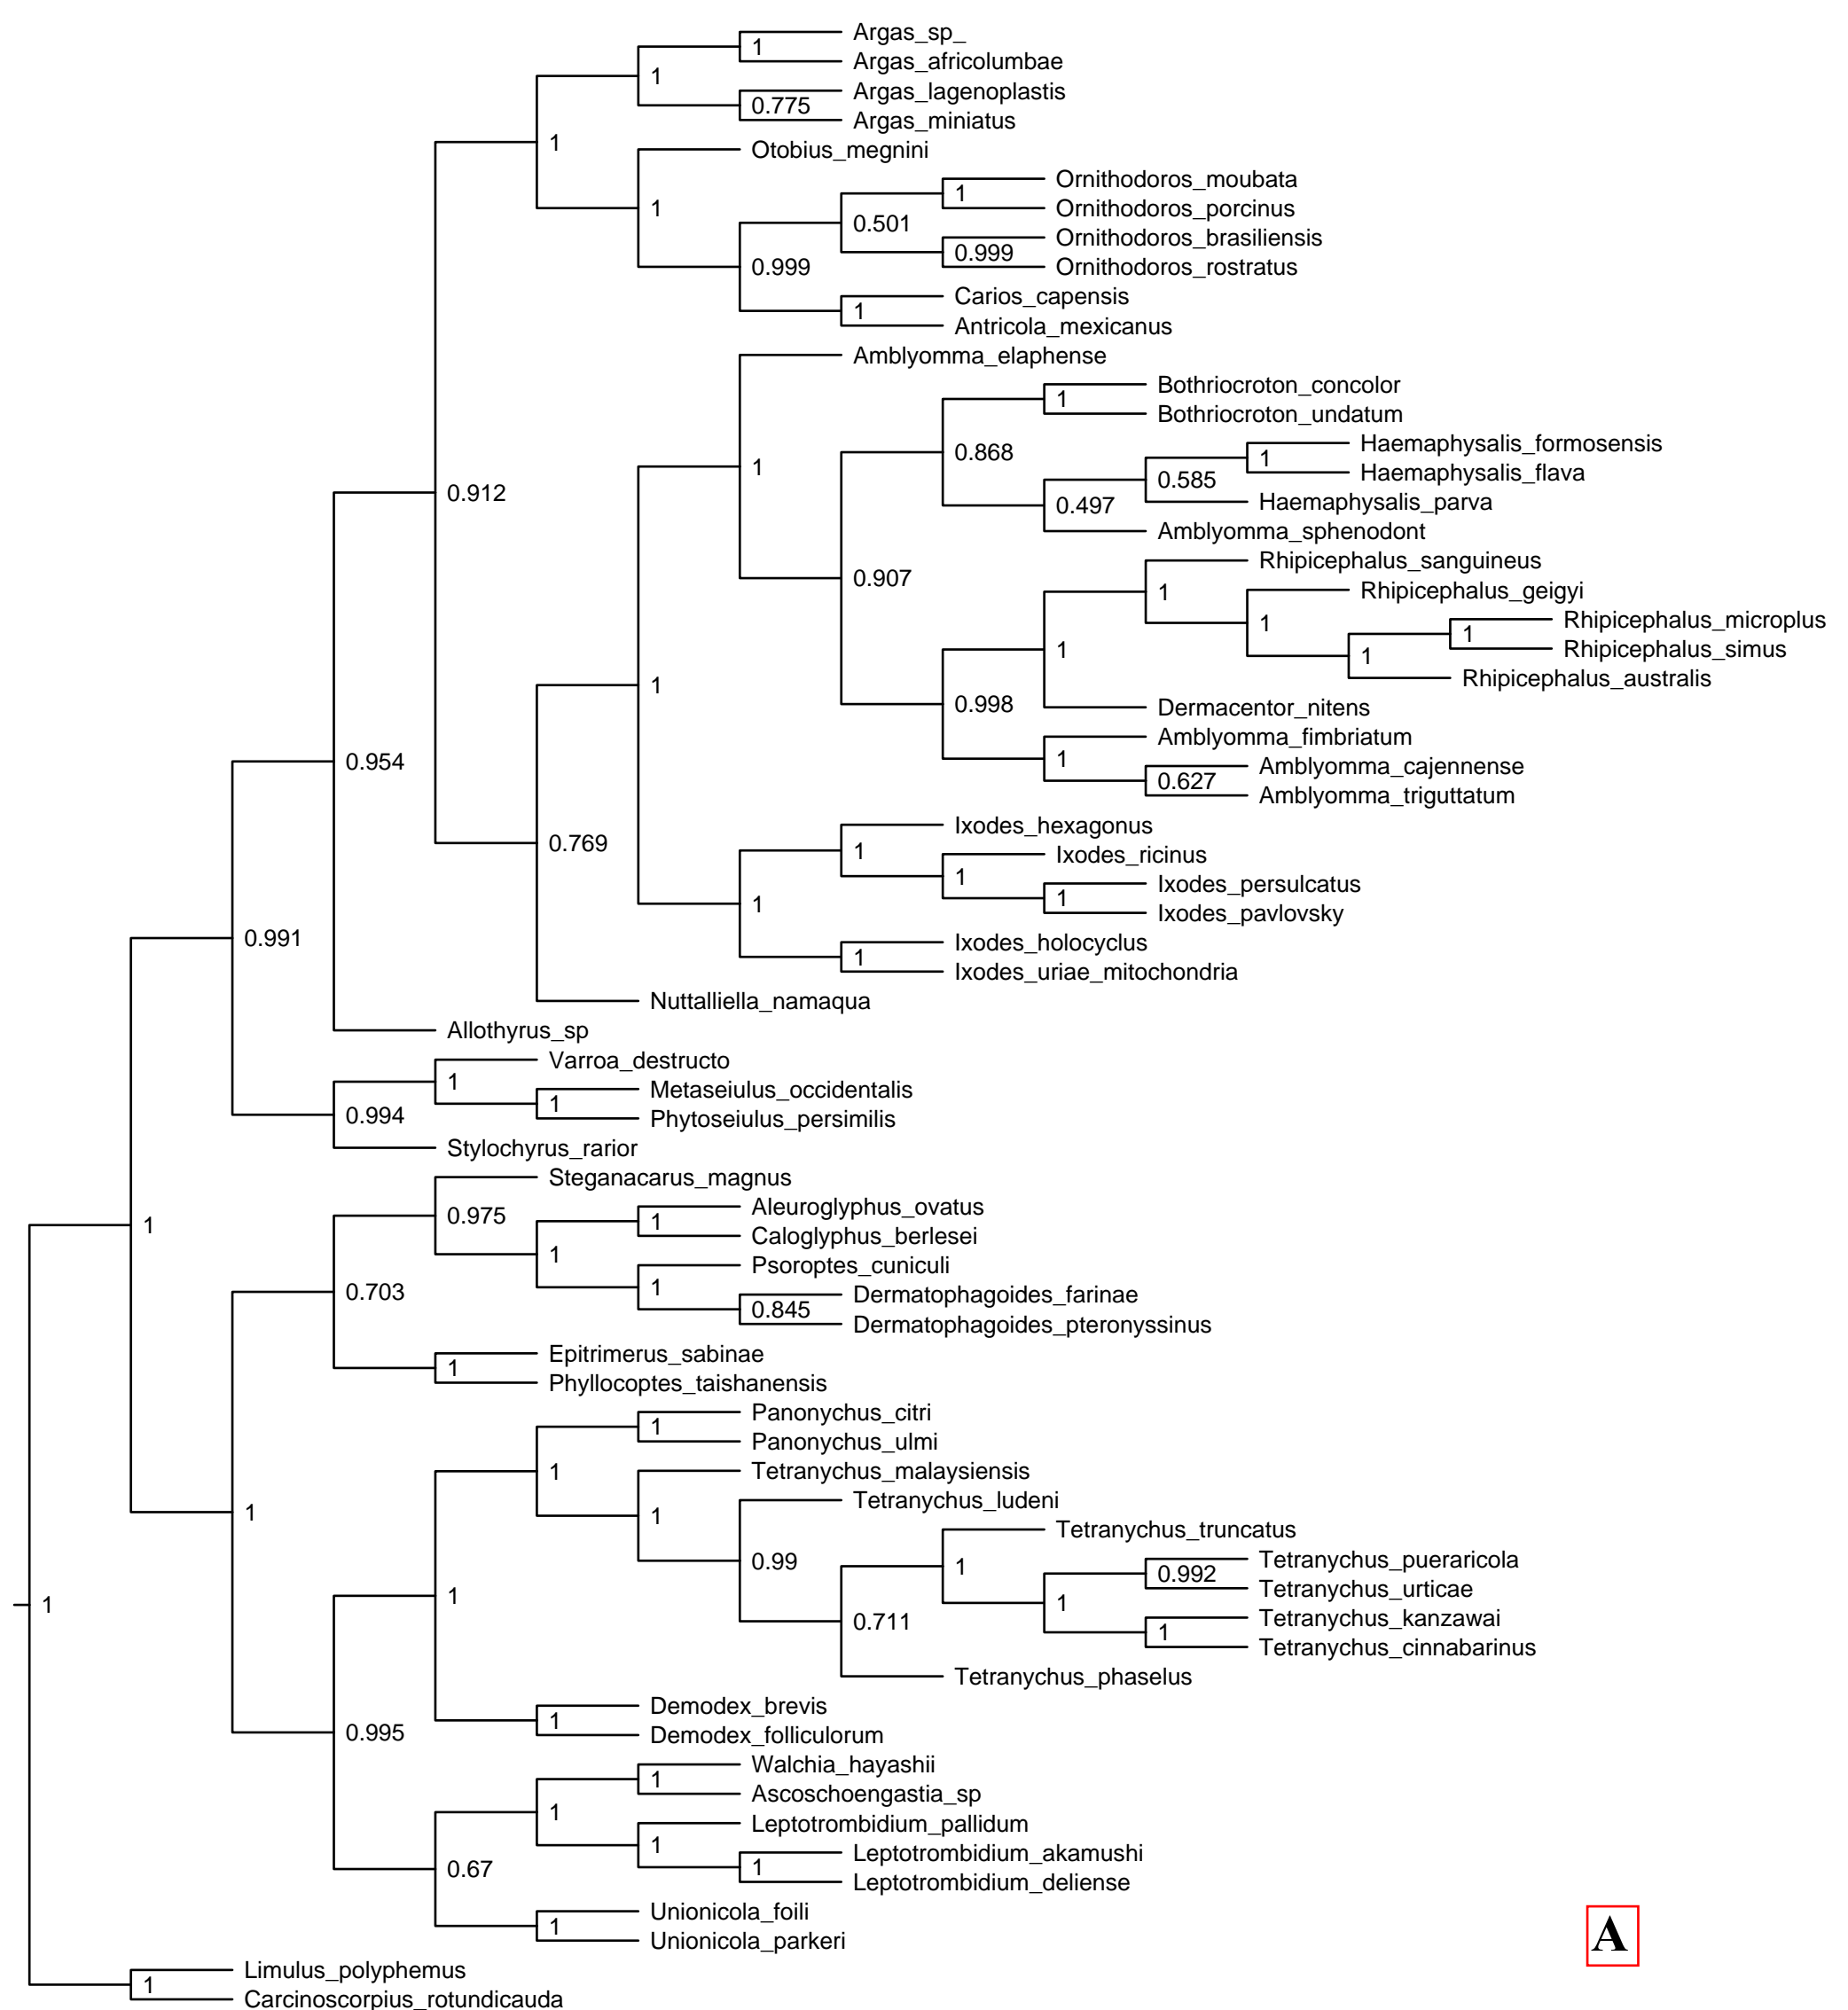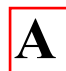

0.002

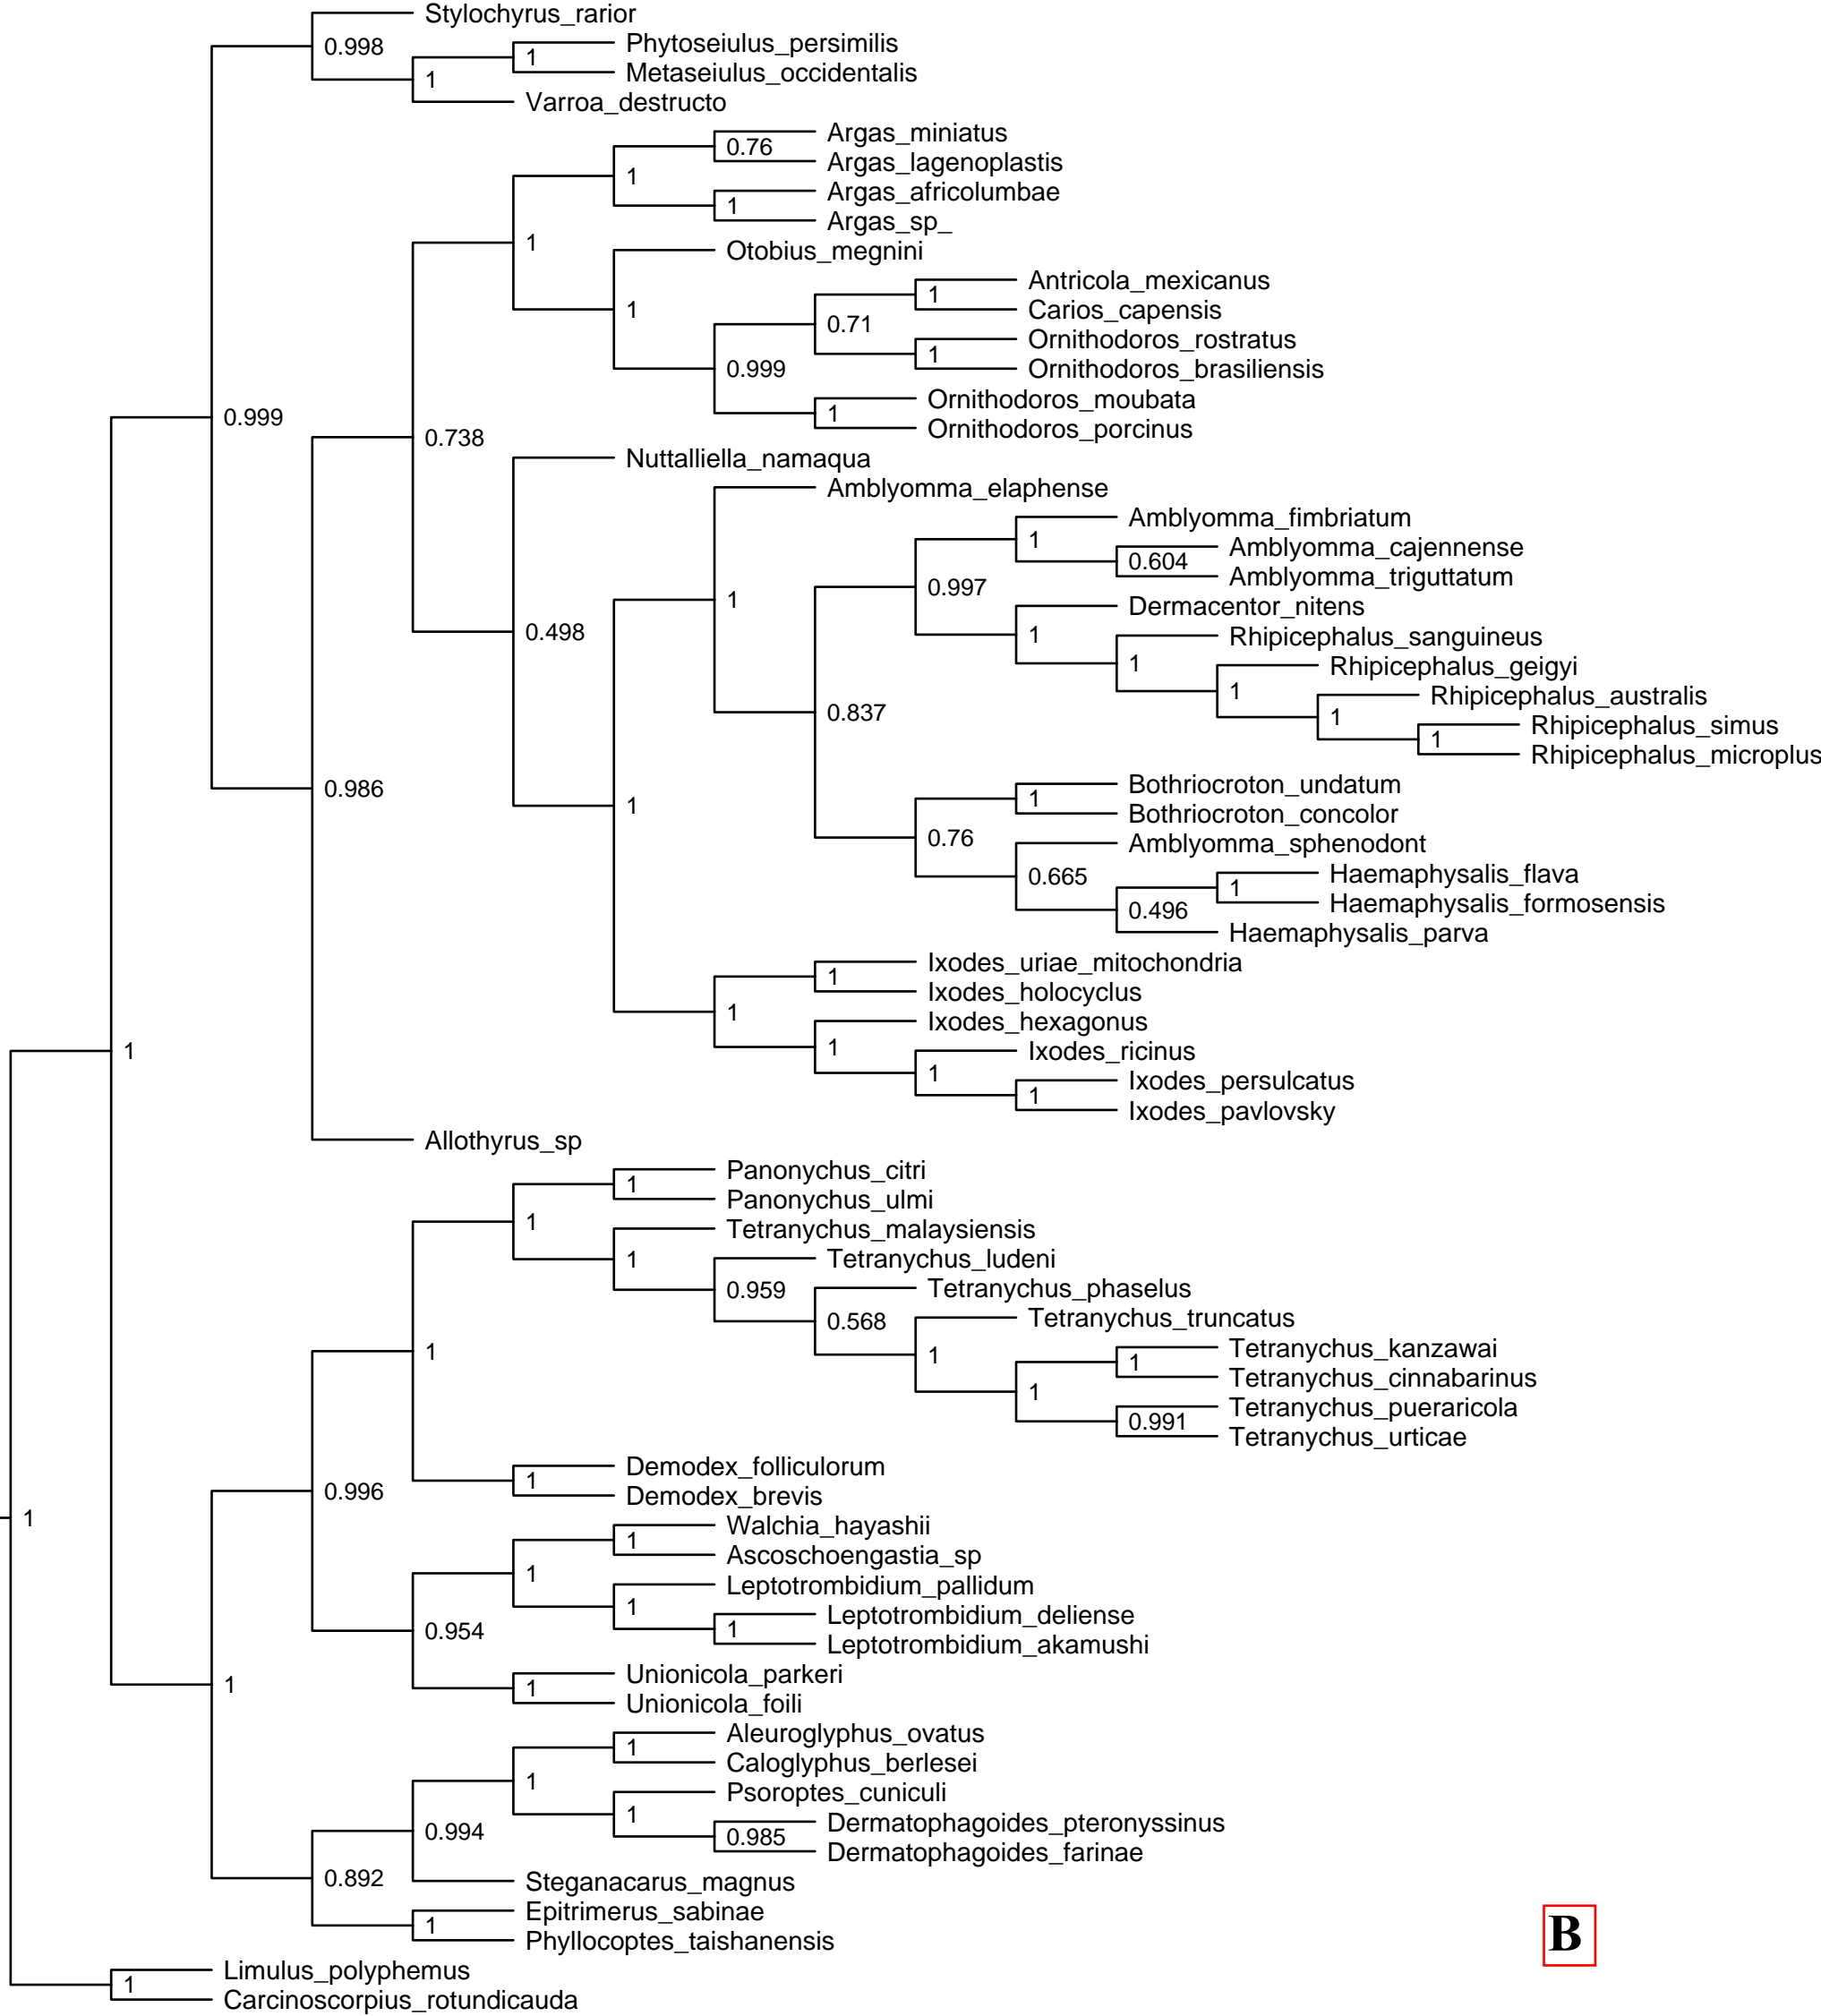

**B**

0.002

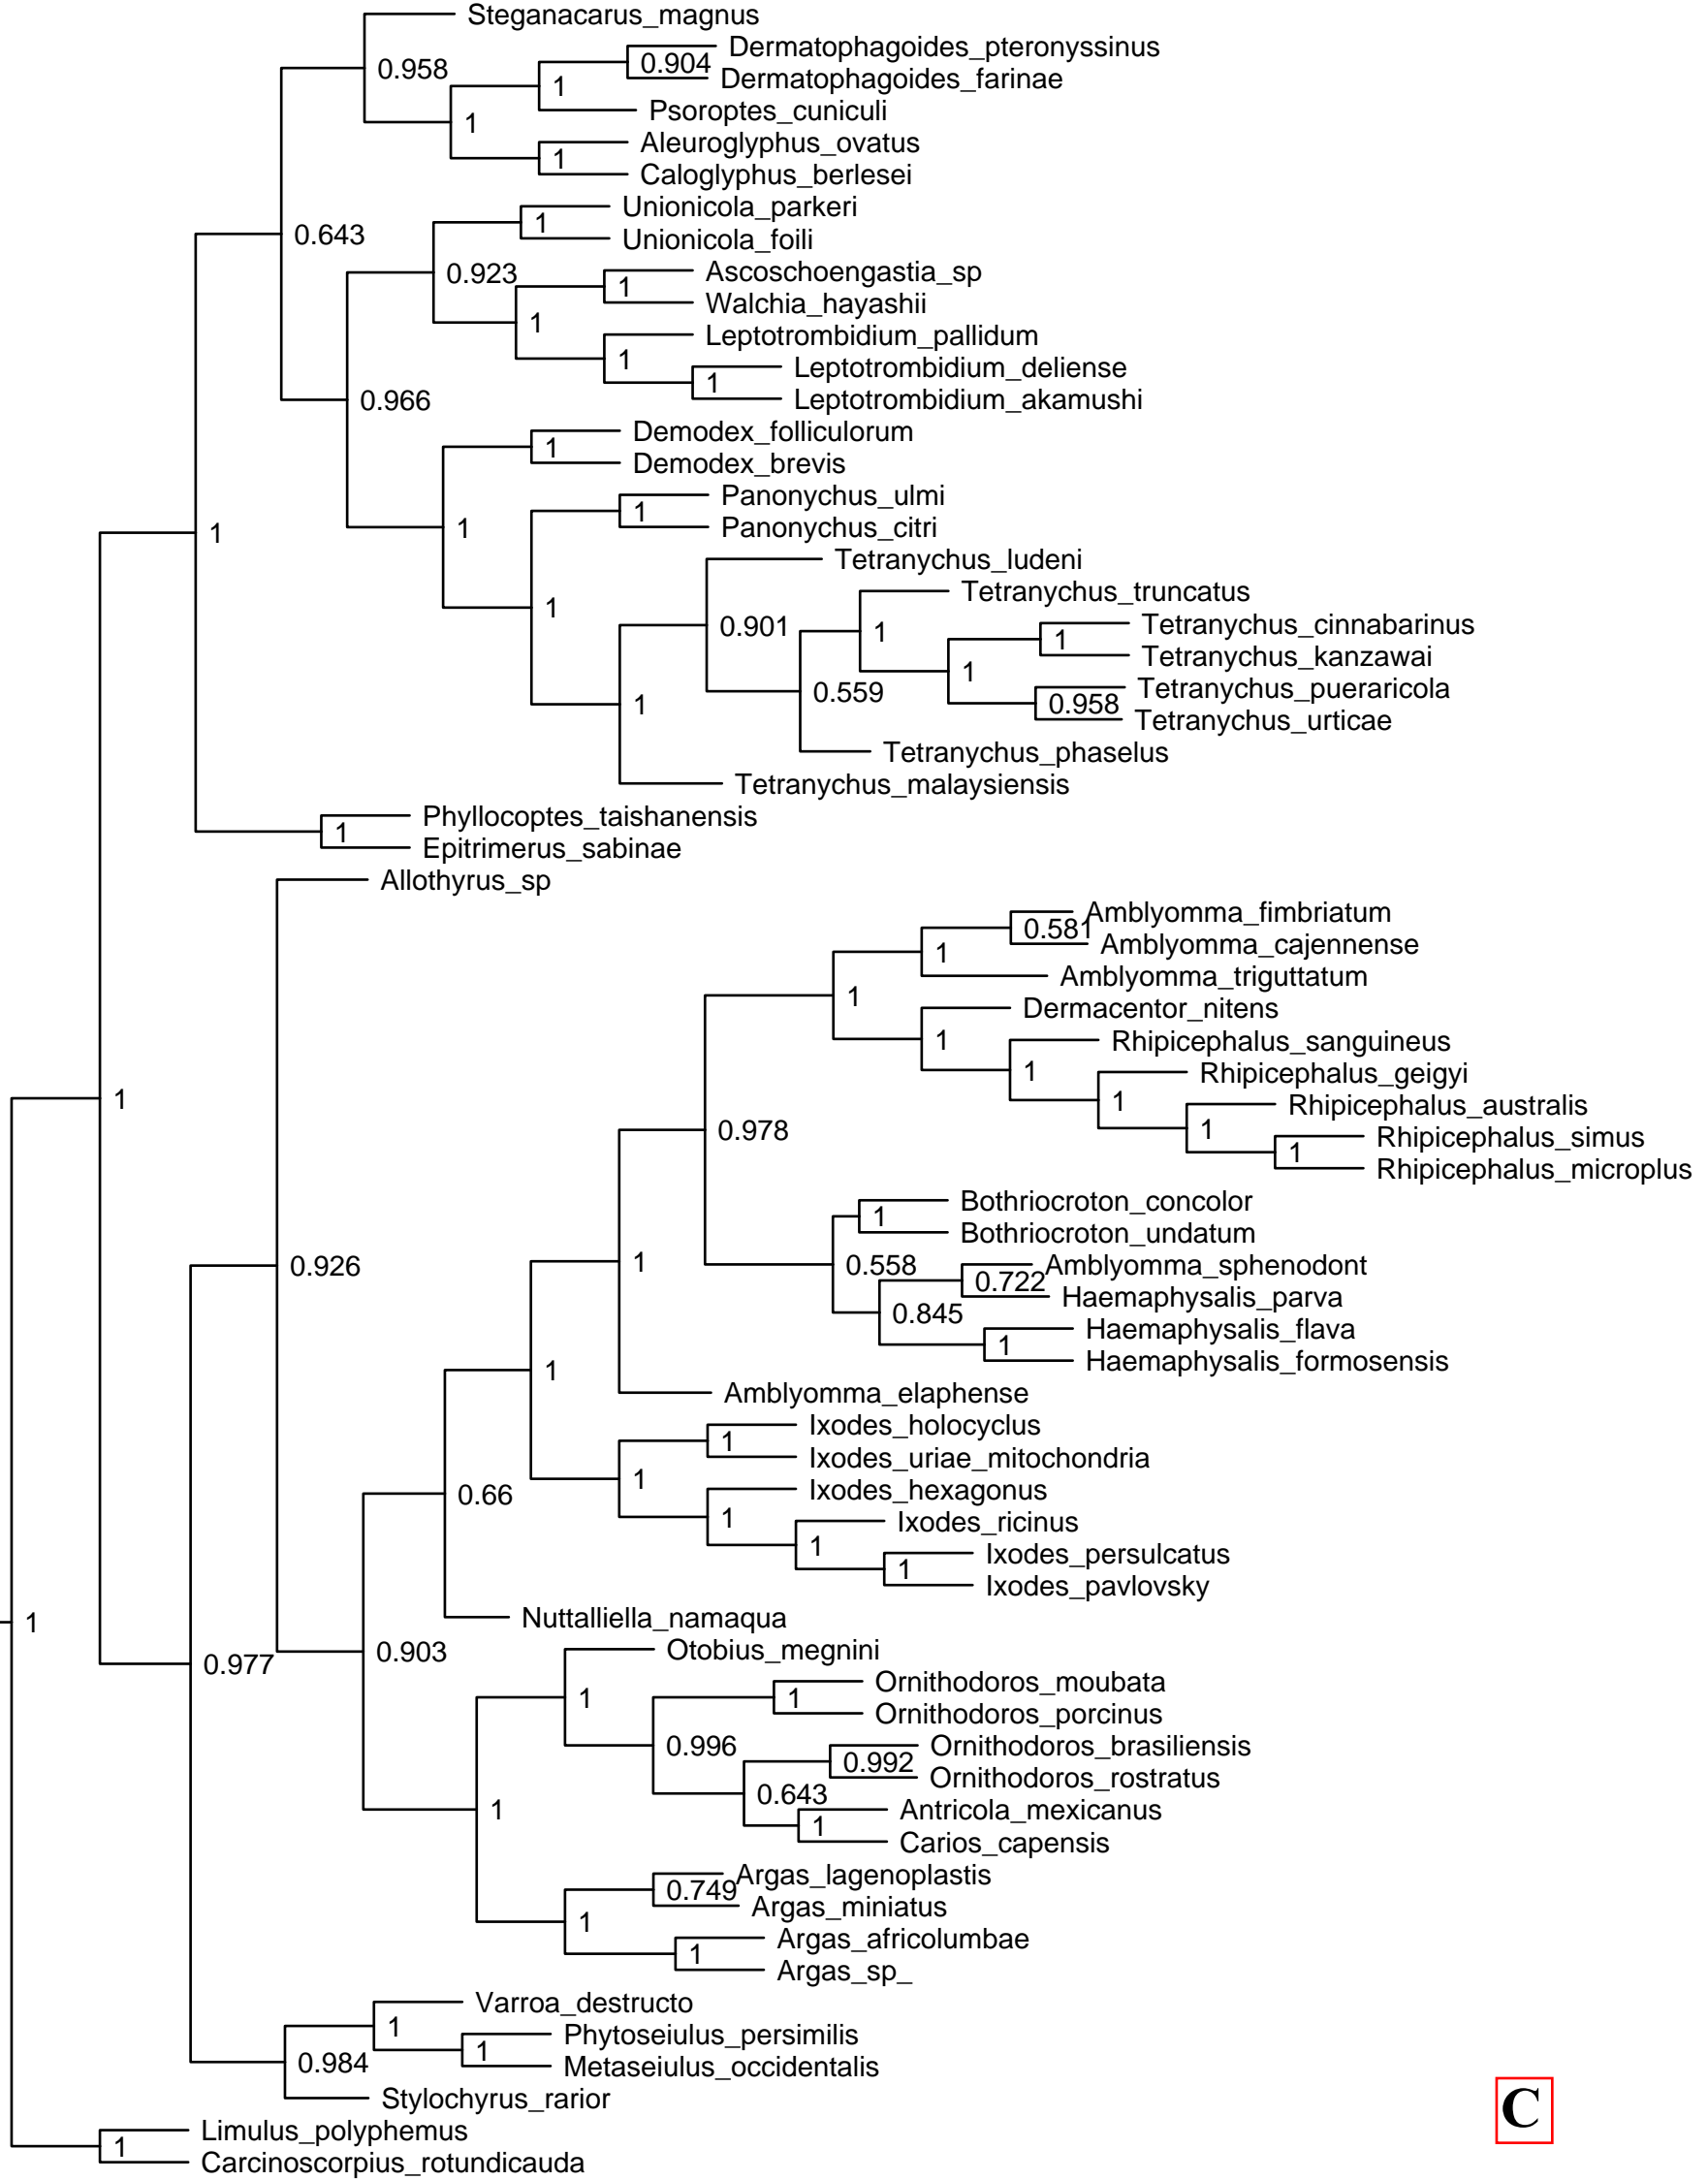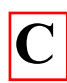

0.002

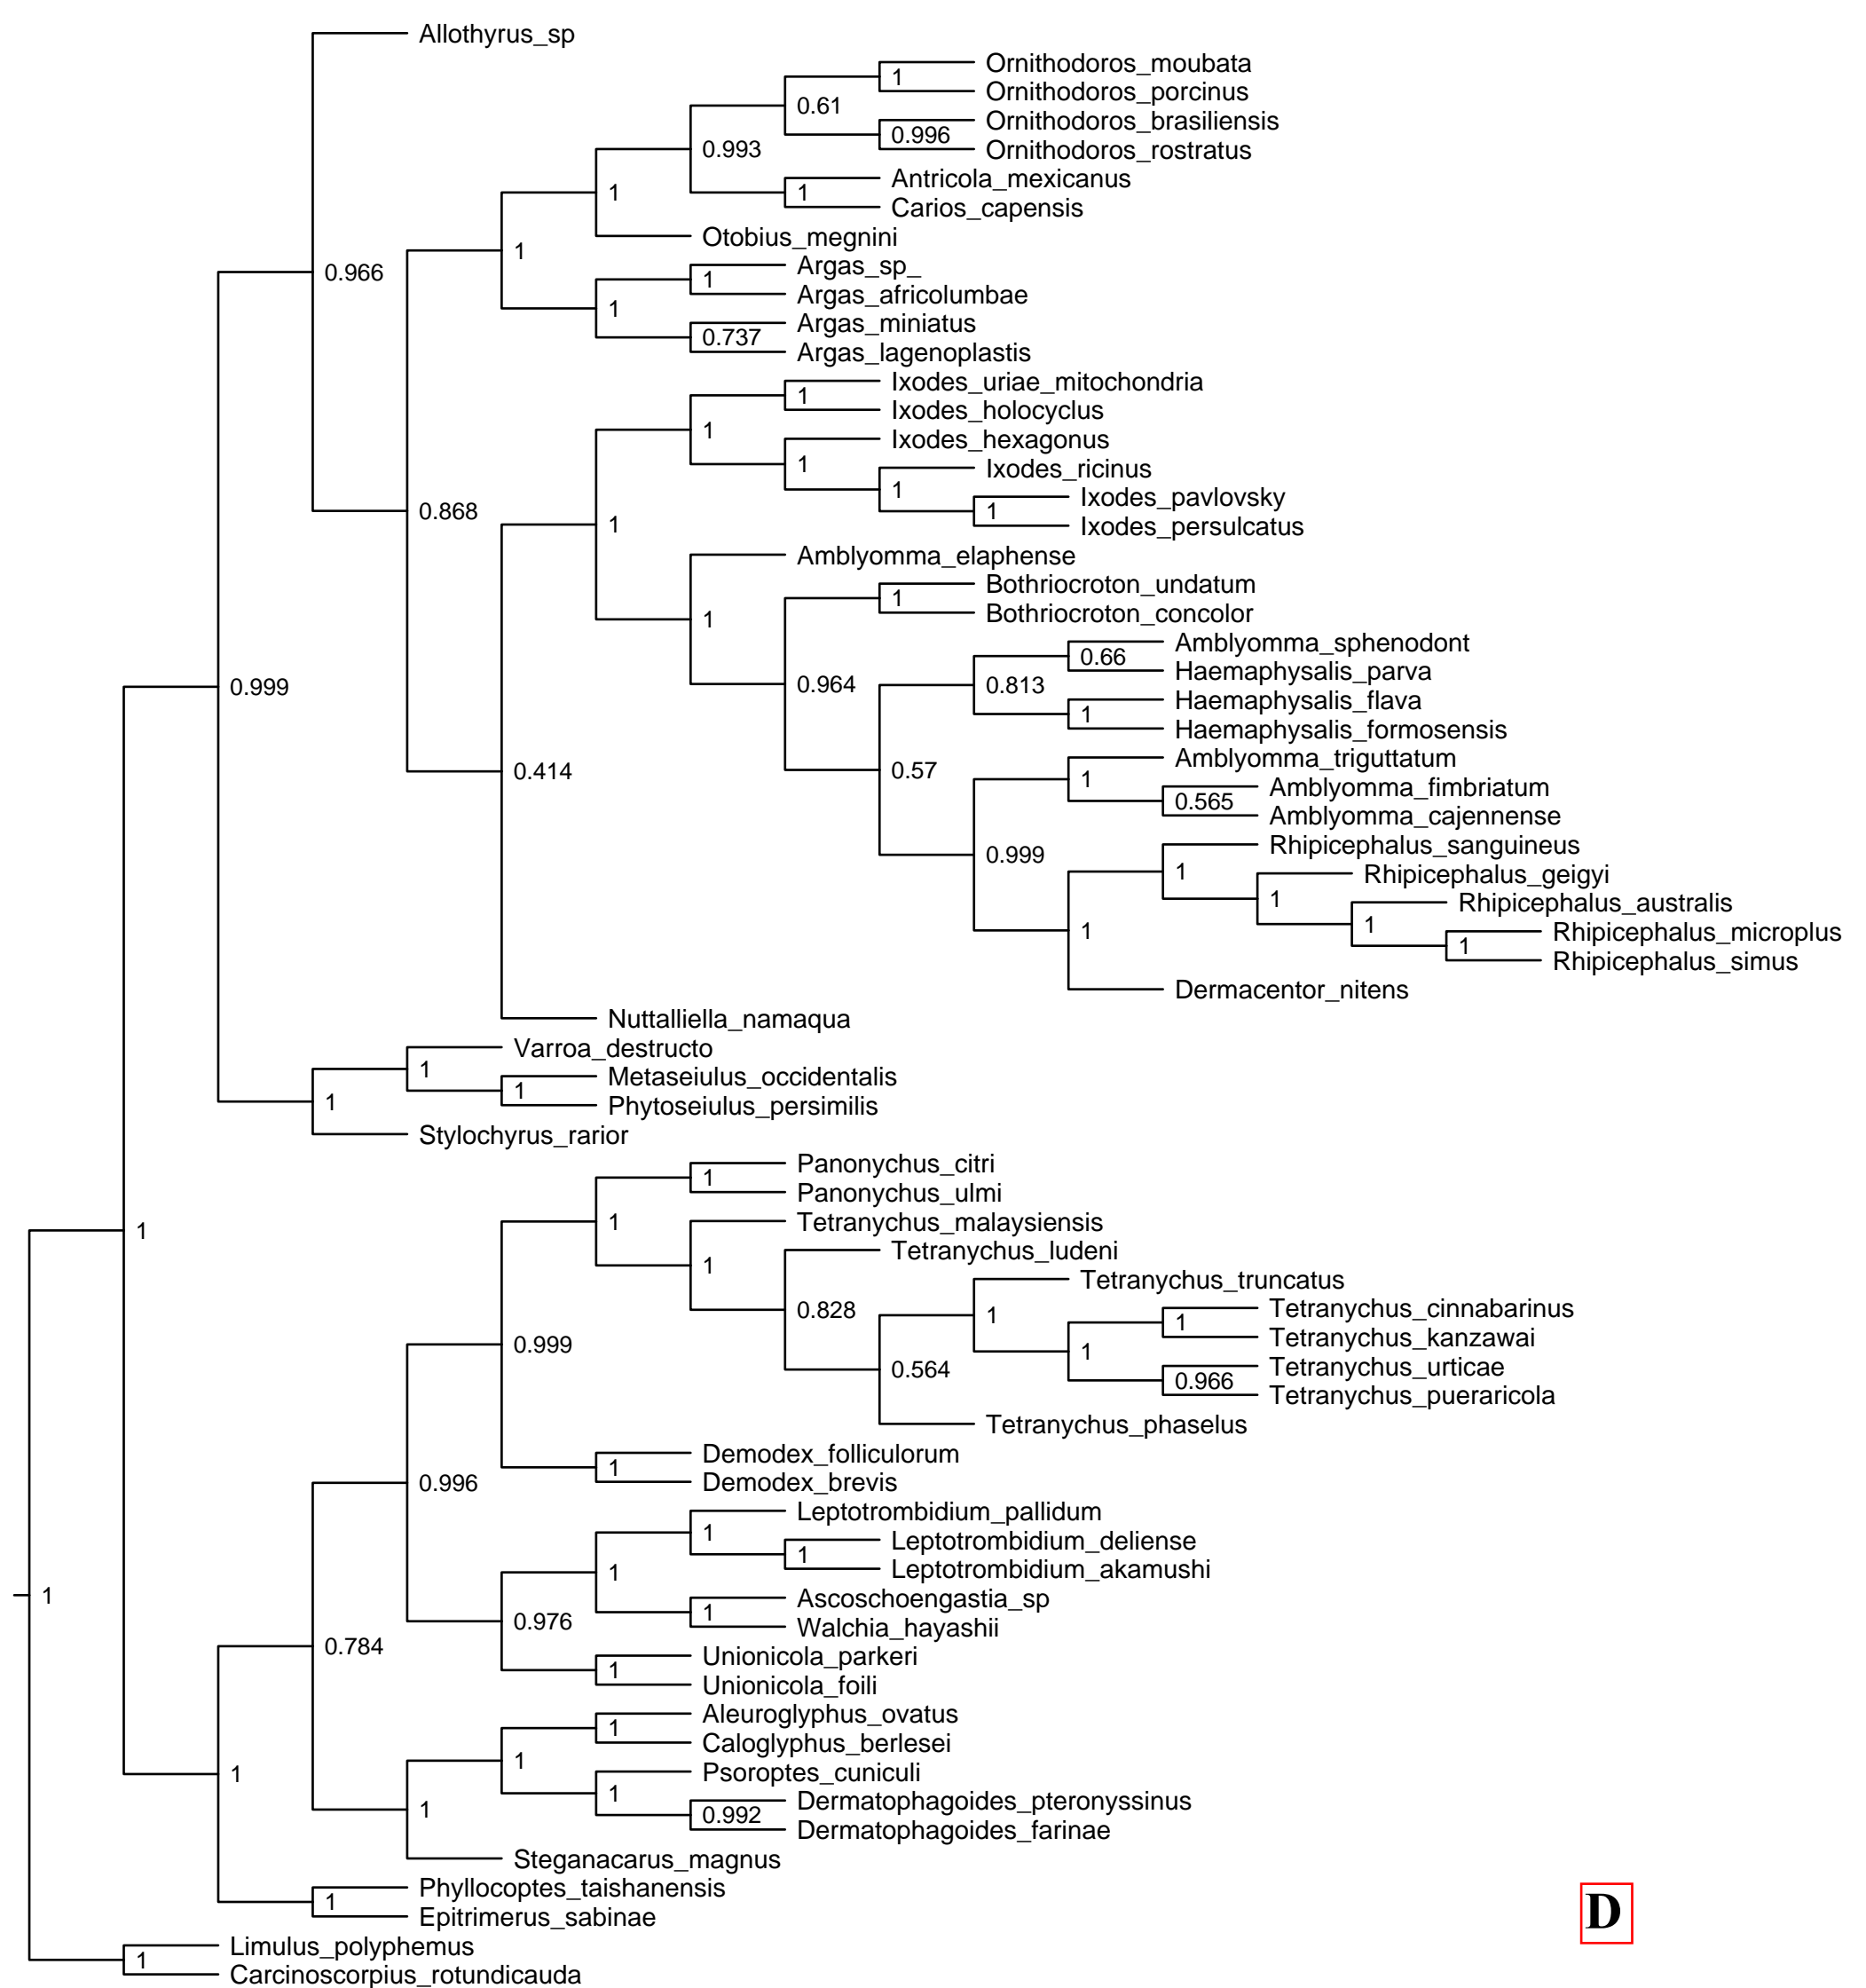

**D**

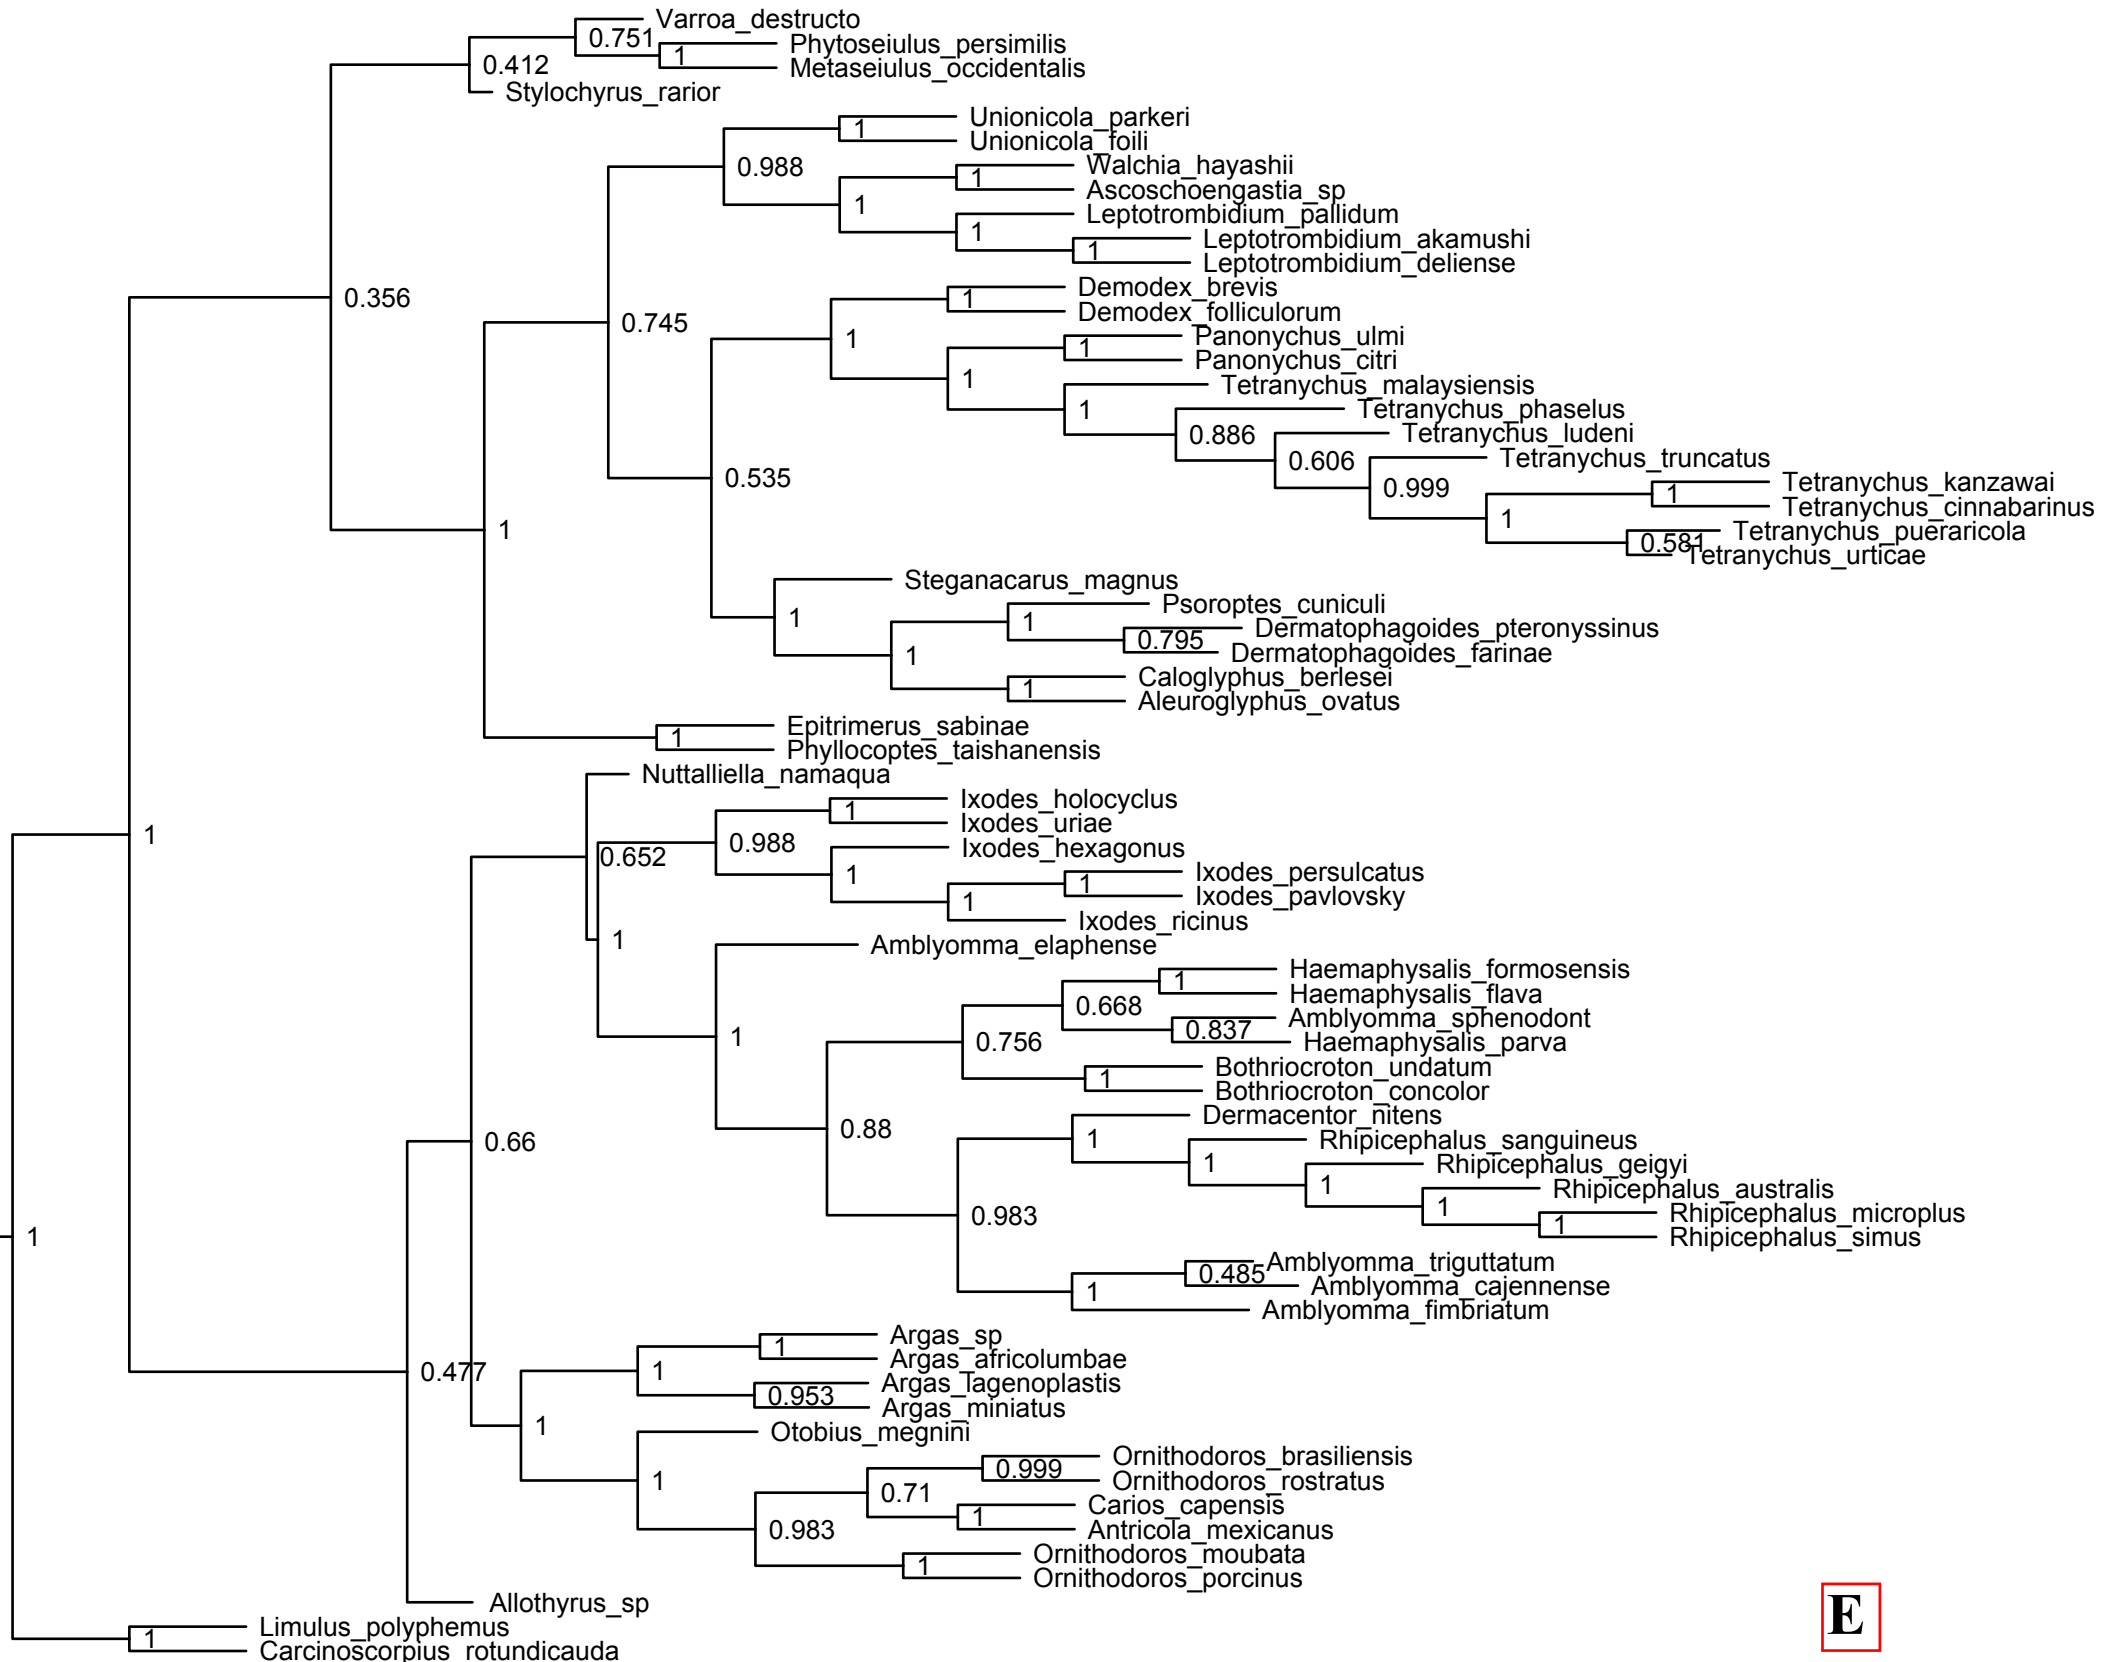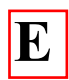

0.002

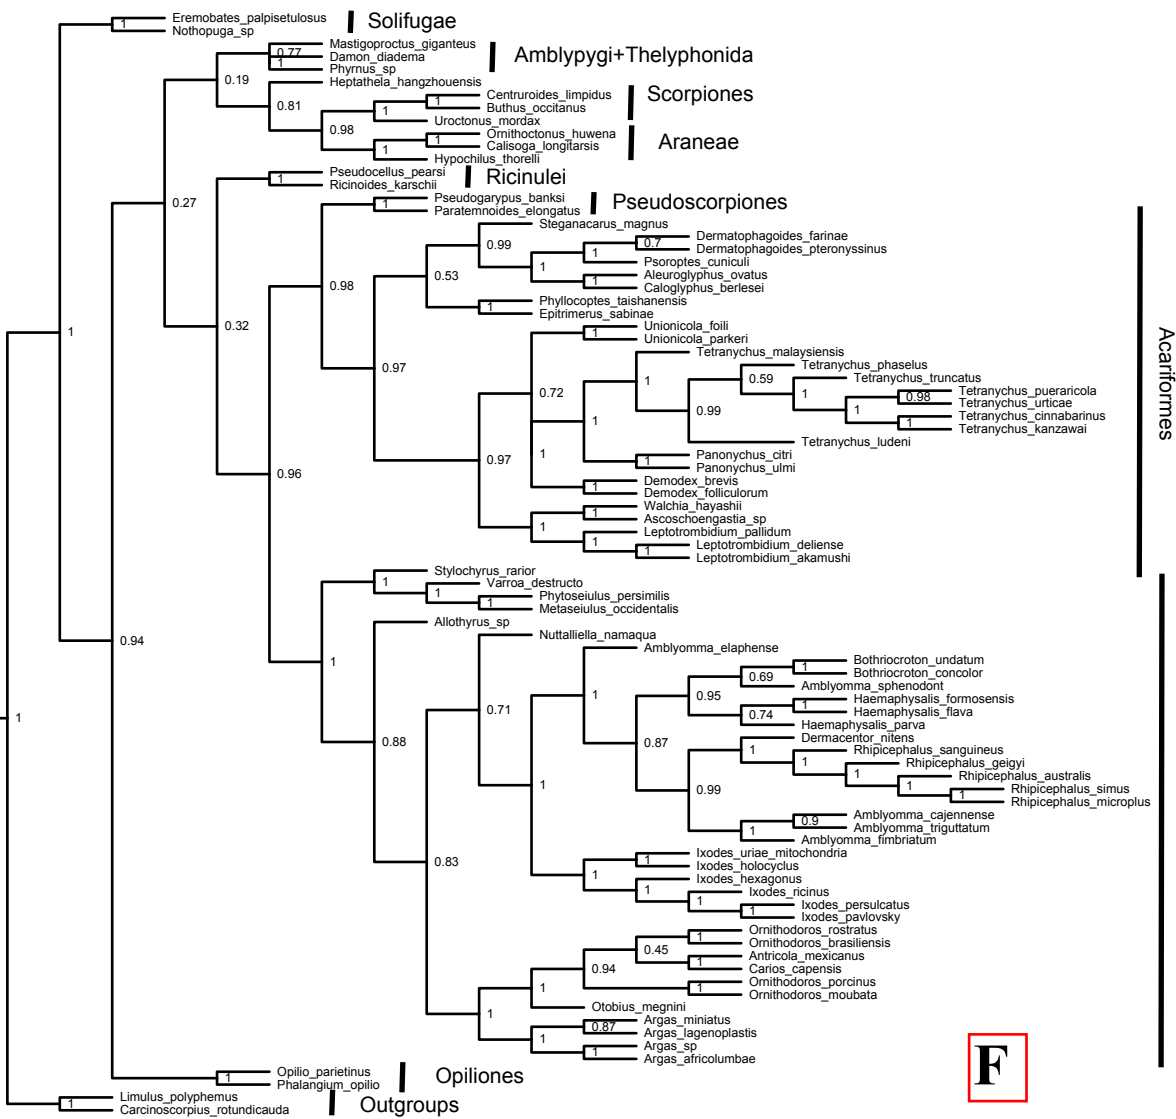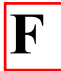



**Supplementary Figure S2.** Bayesian maximum credibility trees inferred by: A) nucleotide sequences by 16 partitions; B) amino acid sequences partitioned by 13 genes; C) nucleotide sequences by 16 partitions, except the third positions of the PCGs; D) nucleotide sequences by 6 partitions; E) nucleotide sequences by 6 partitions, except the third positions of the PCGs; F) the best partitions of nucleotide sequences found by PartitionFinder; G) the best partitions of nucleotide sequences found by PartitionFinder with truncated taxon; H) the best partitions of nucleotide sequences found by PartitionFinder with 13PCGs; and I) nucleotide sequences of PCGs of 86 taxa by 13 partitions. Bayesian posterior probabilities (BPPs) are indicated at each node.

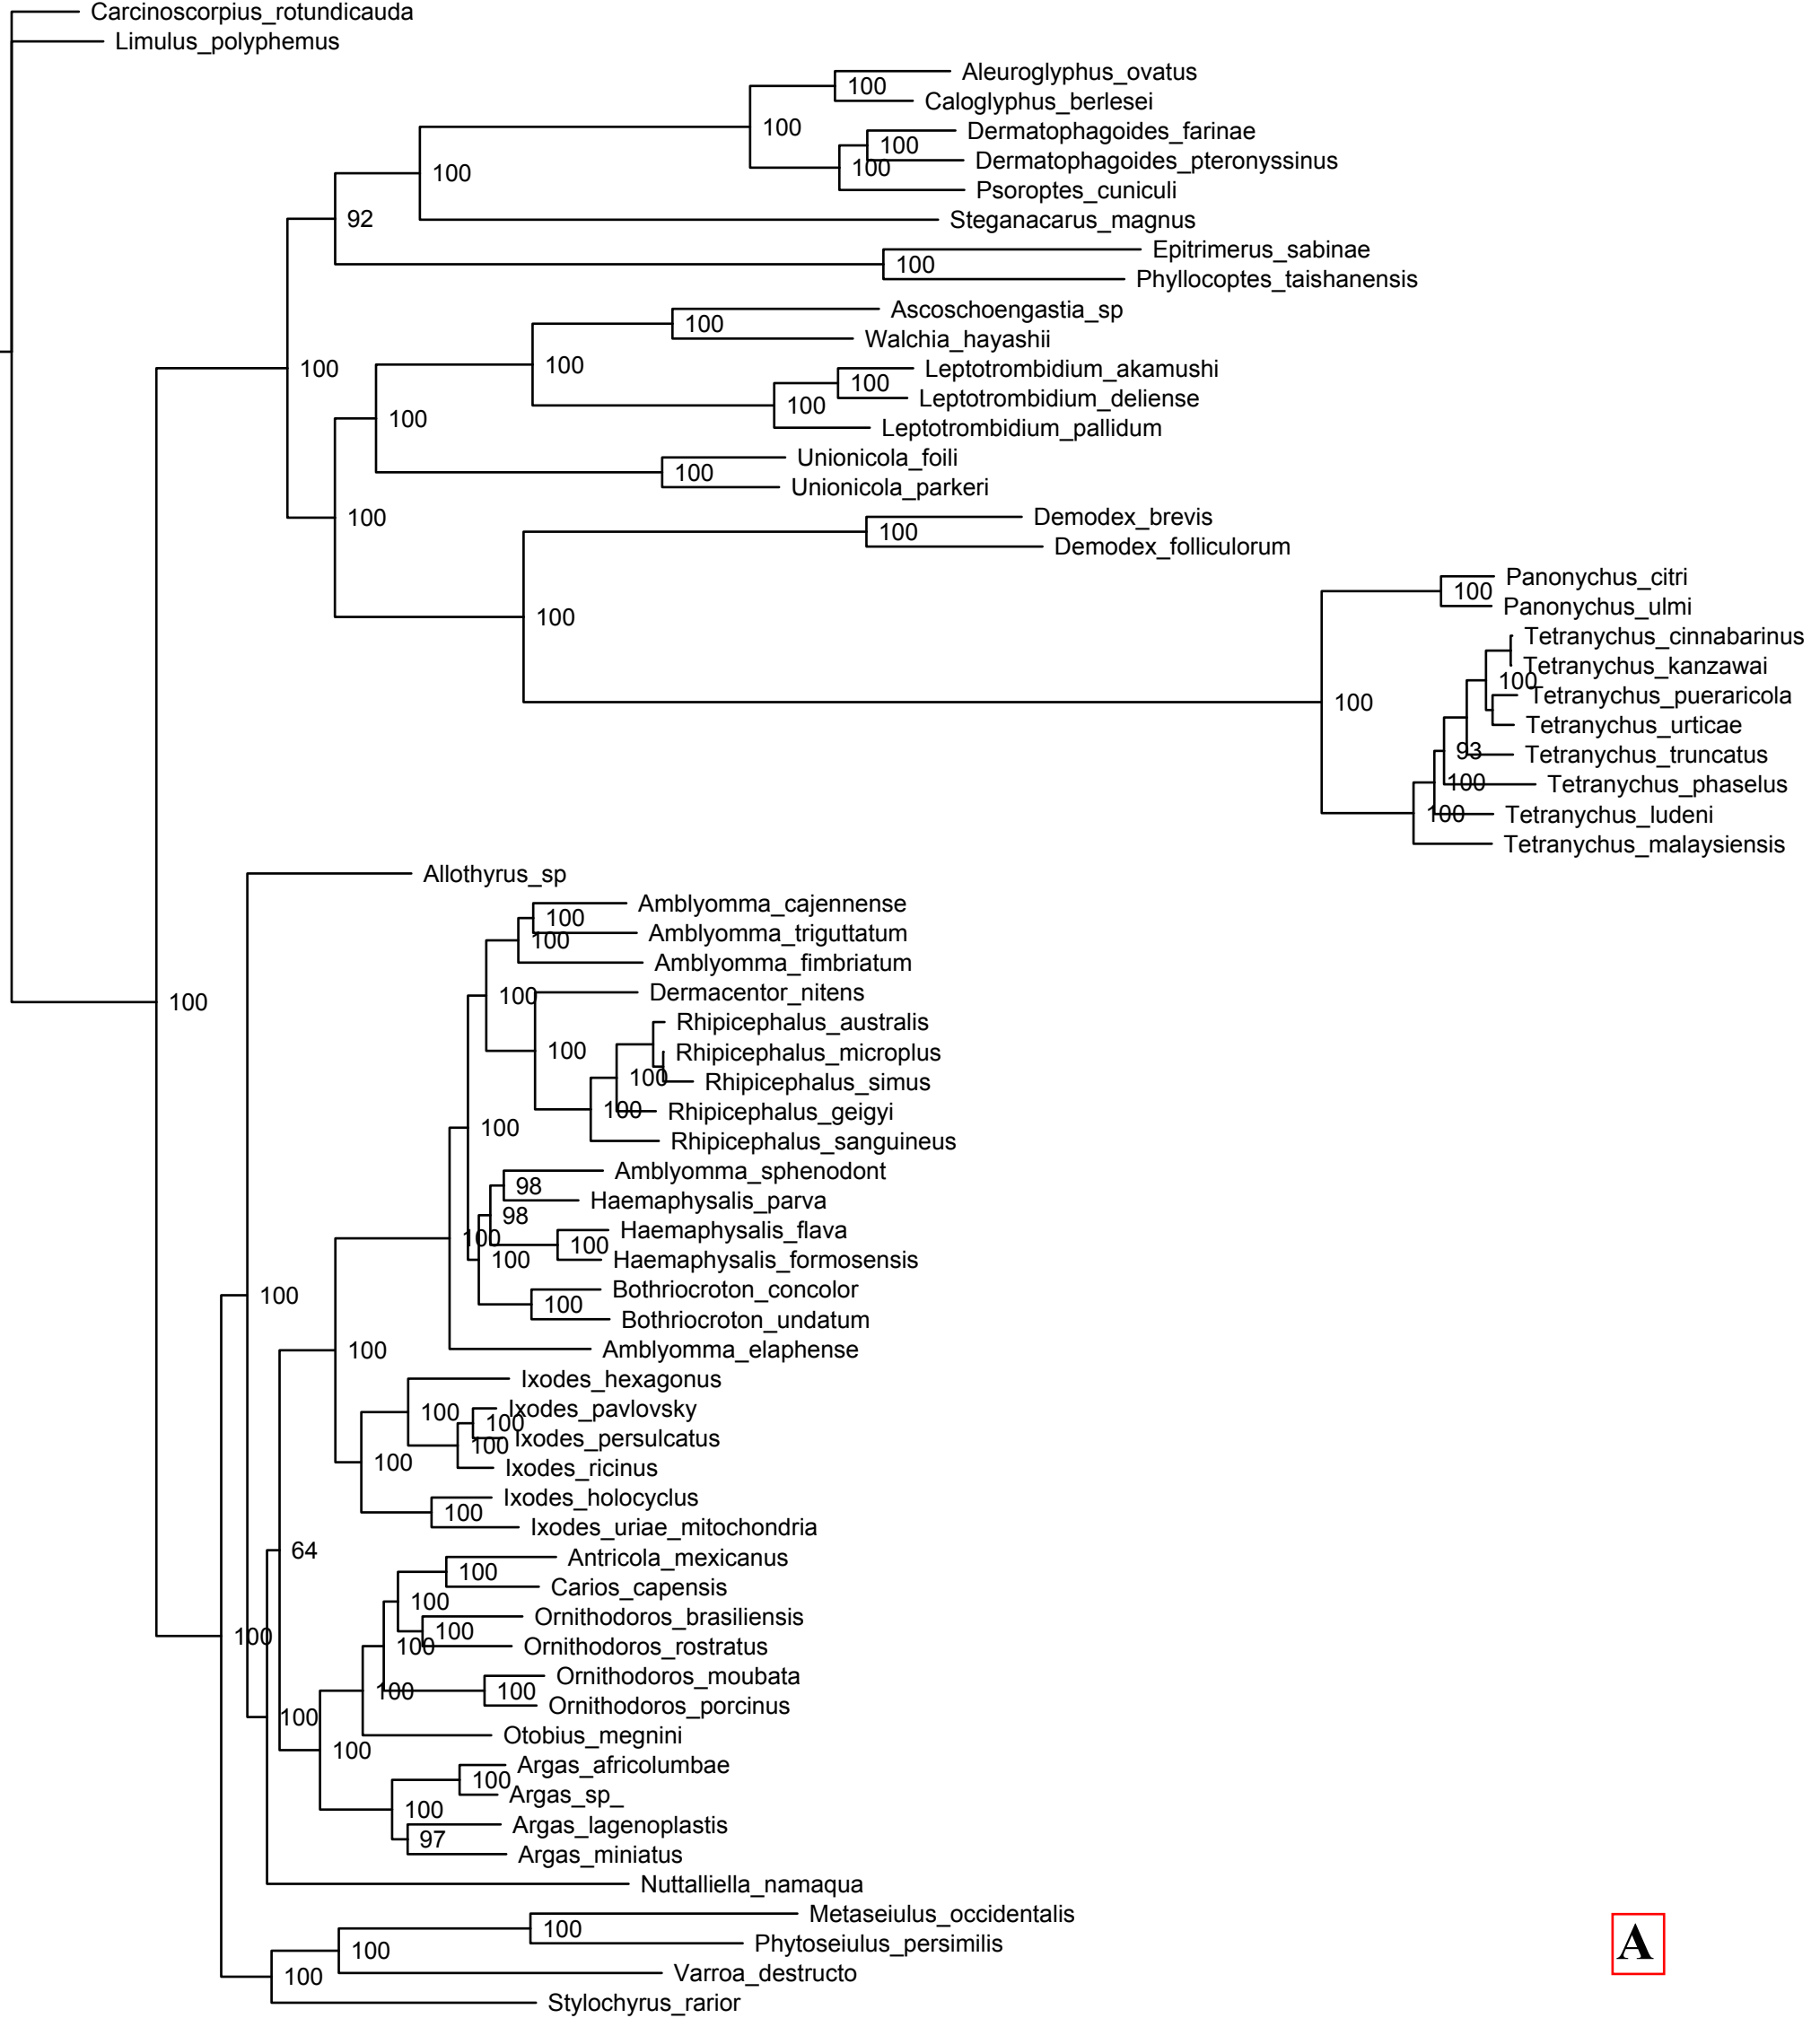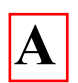

0.4

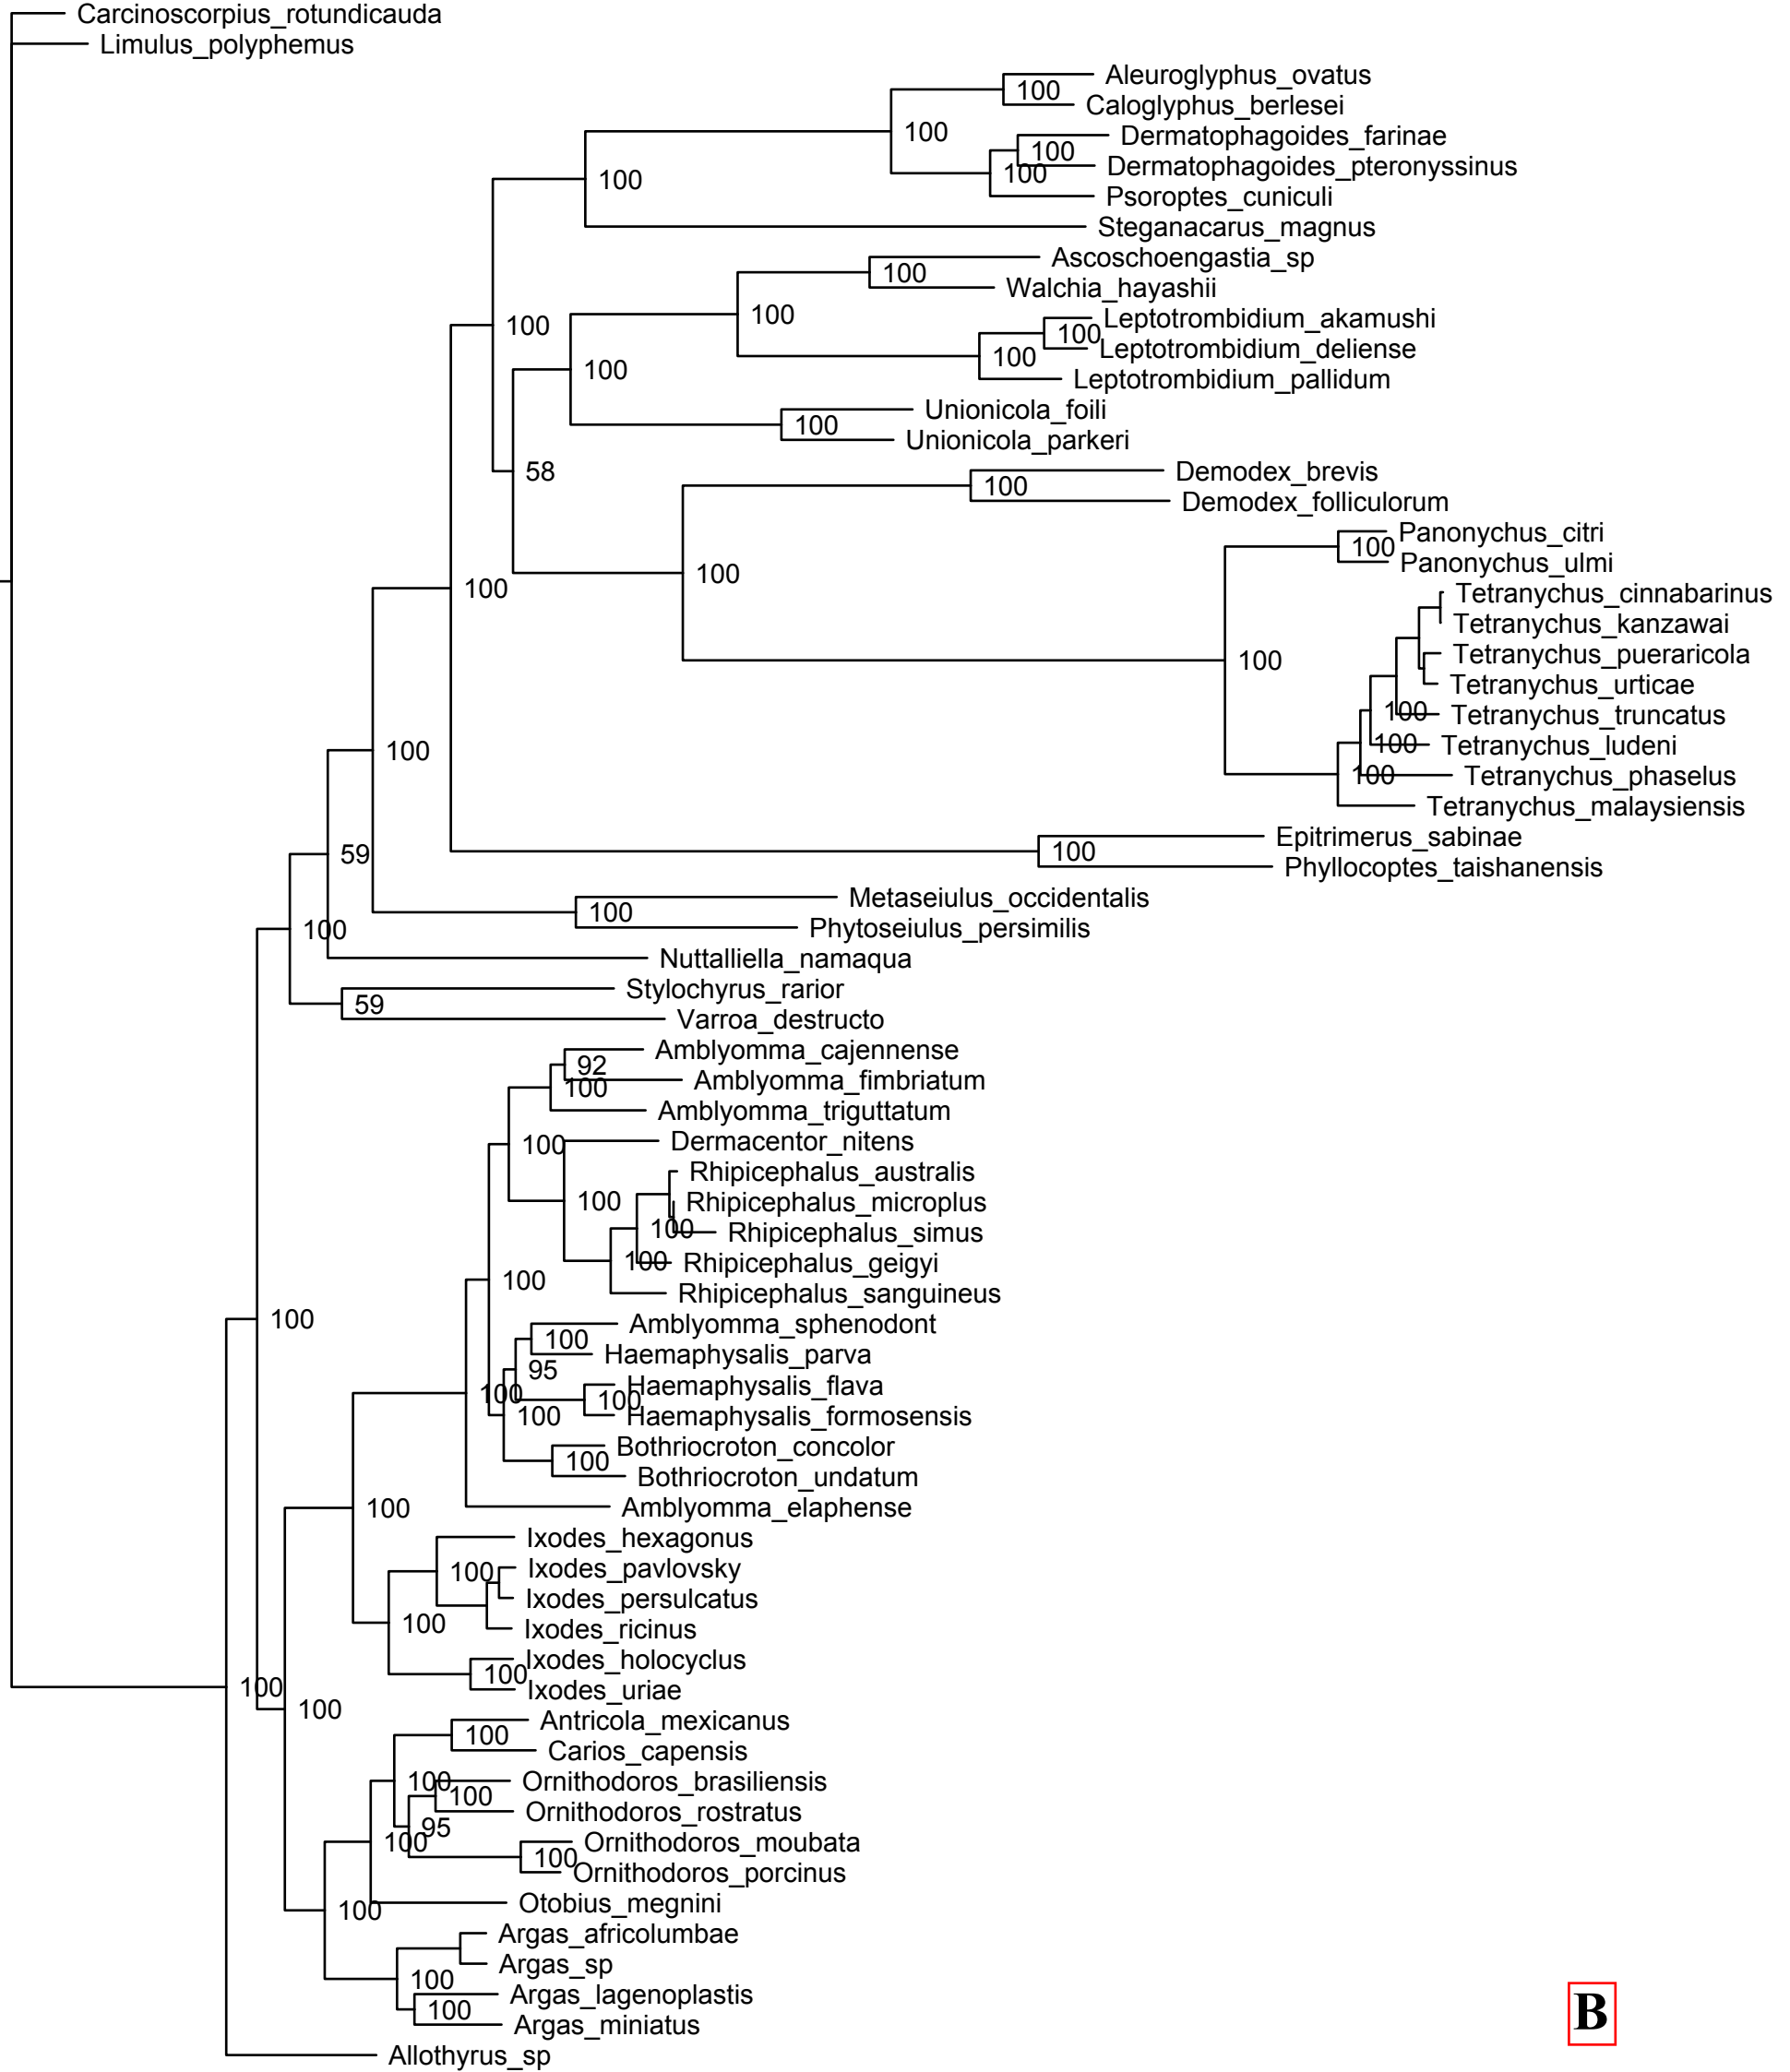

**B**

0.4

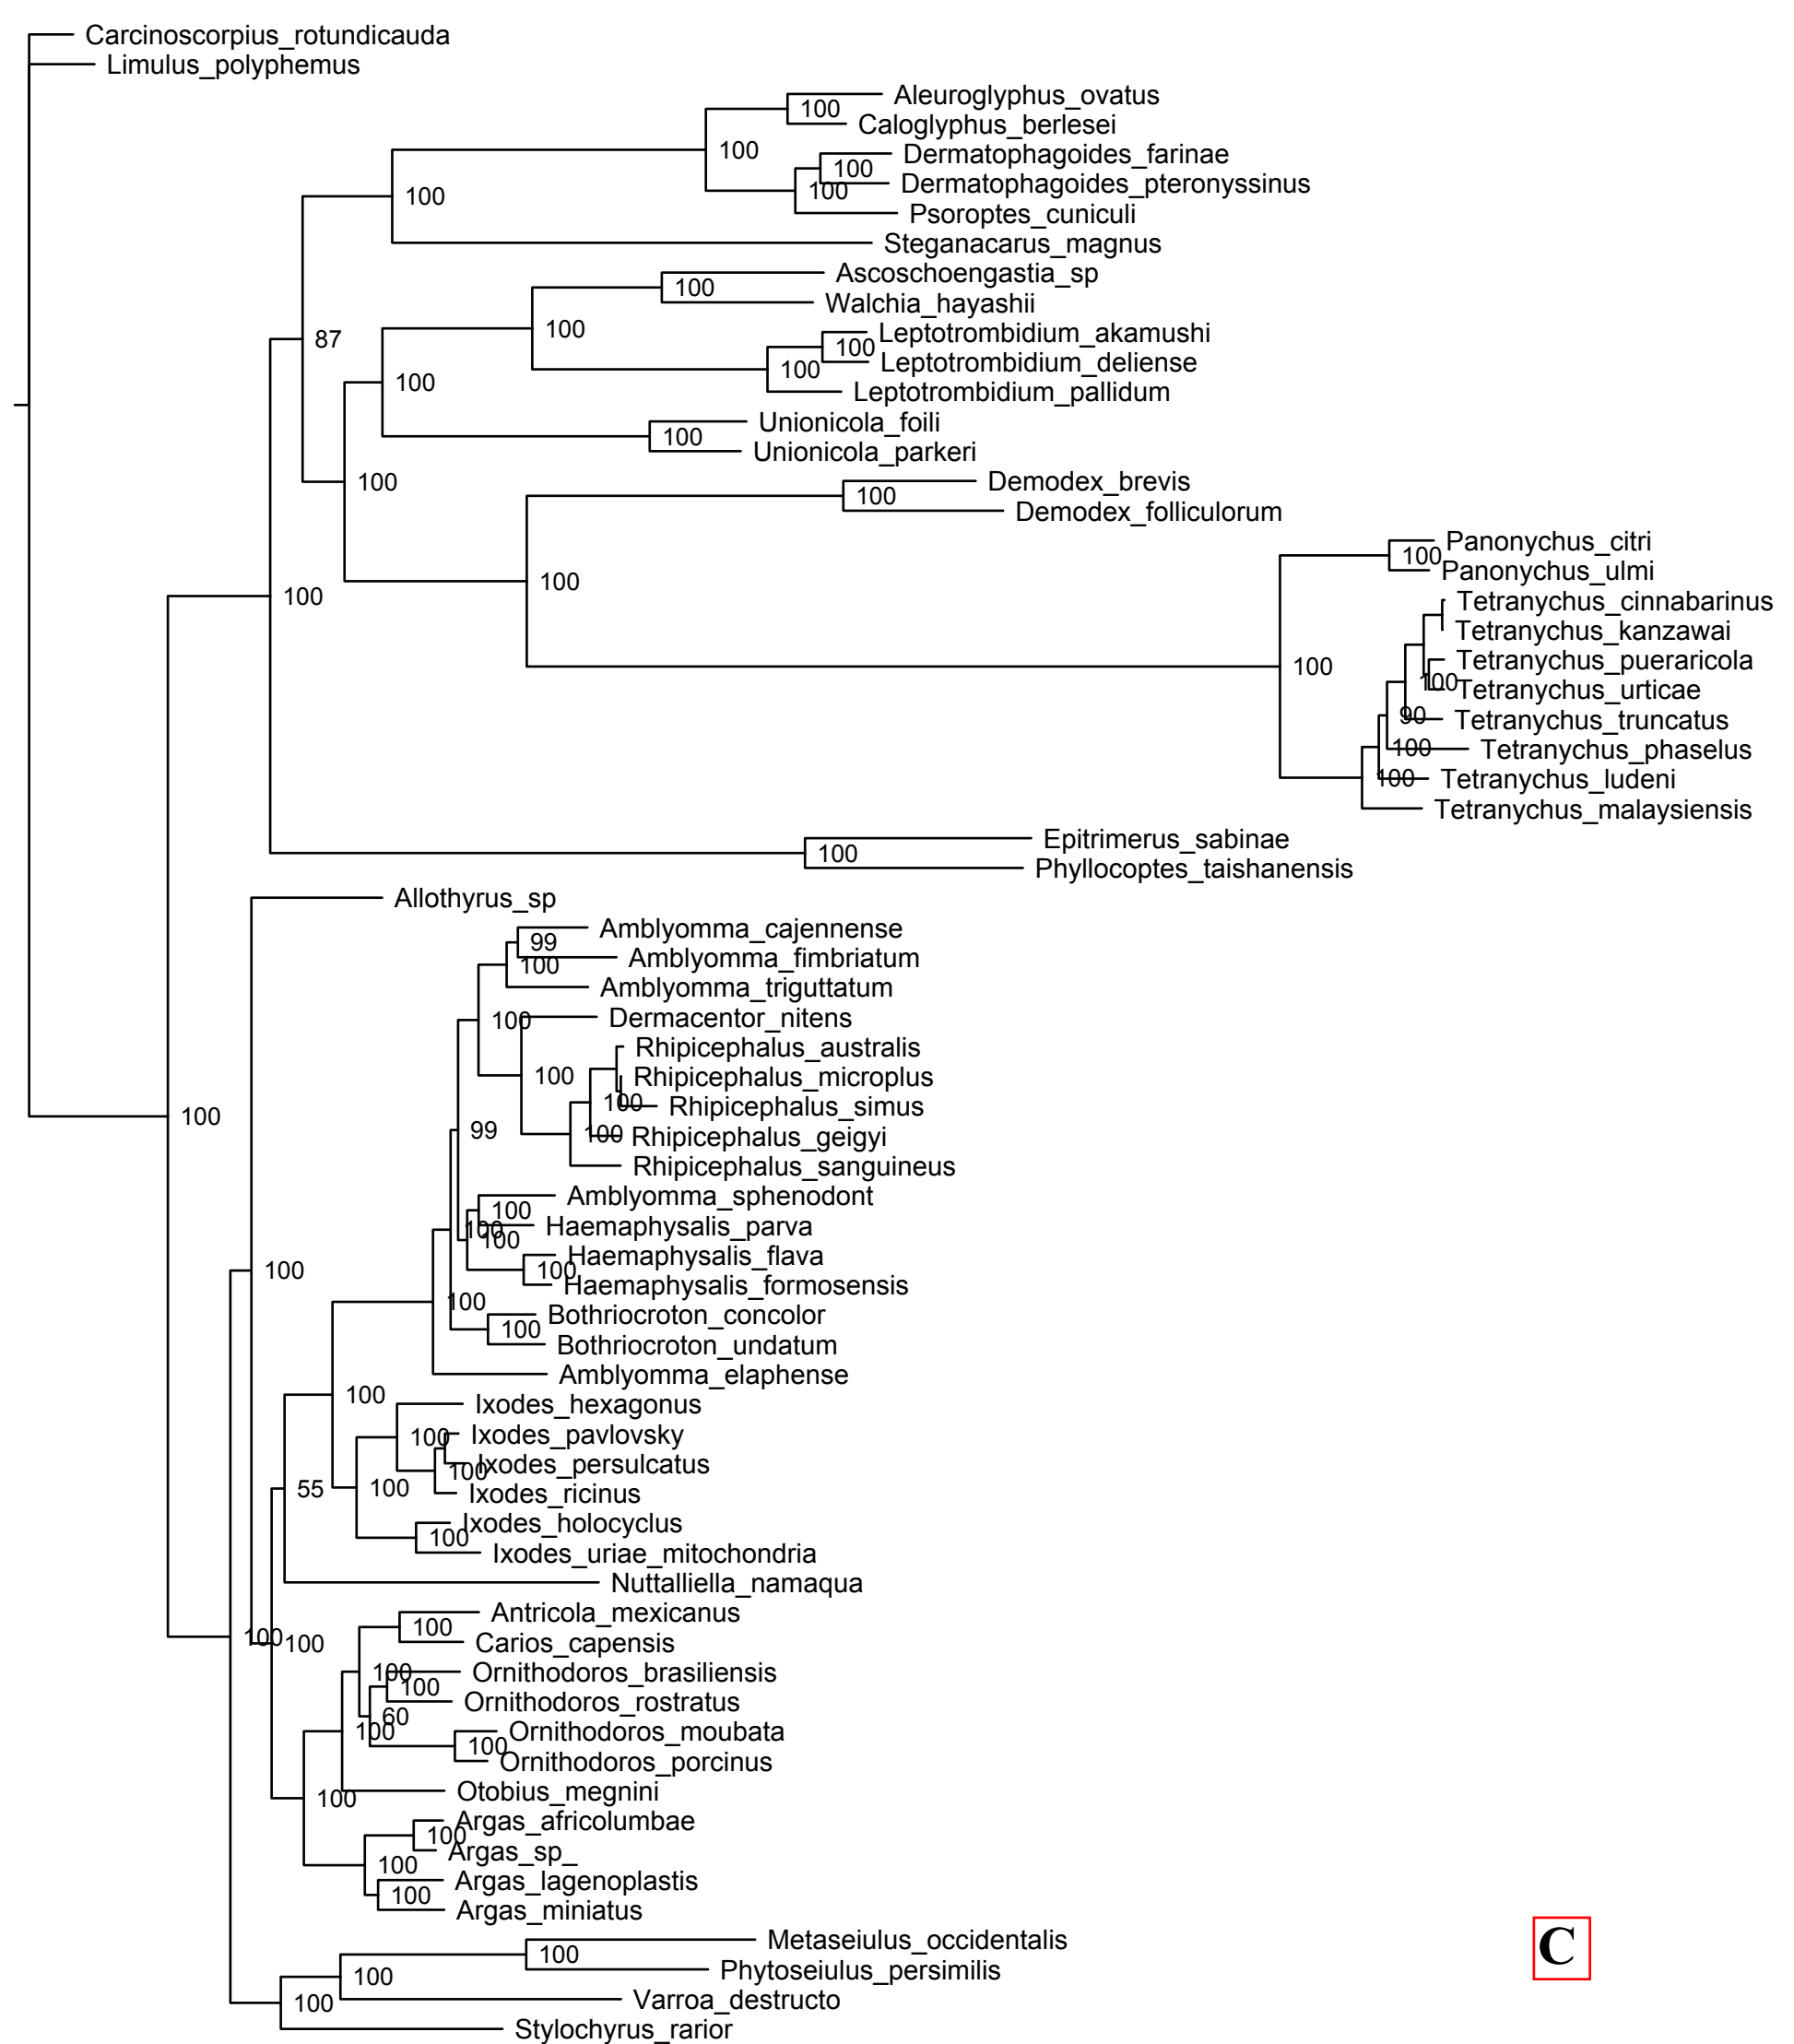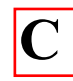

0.3

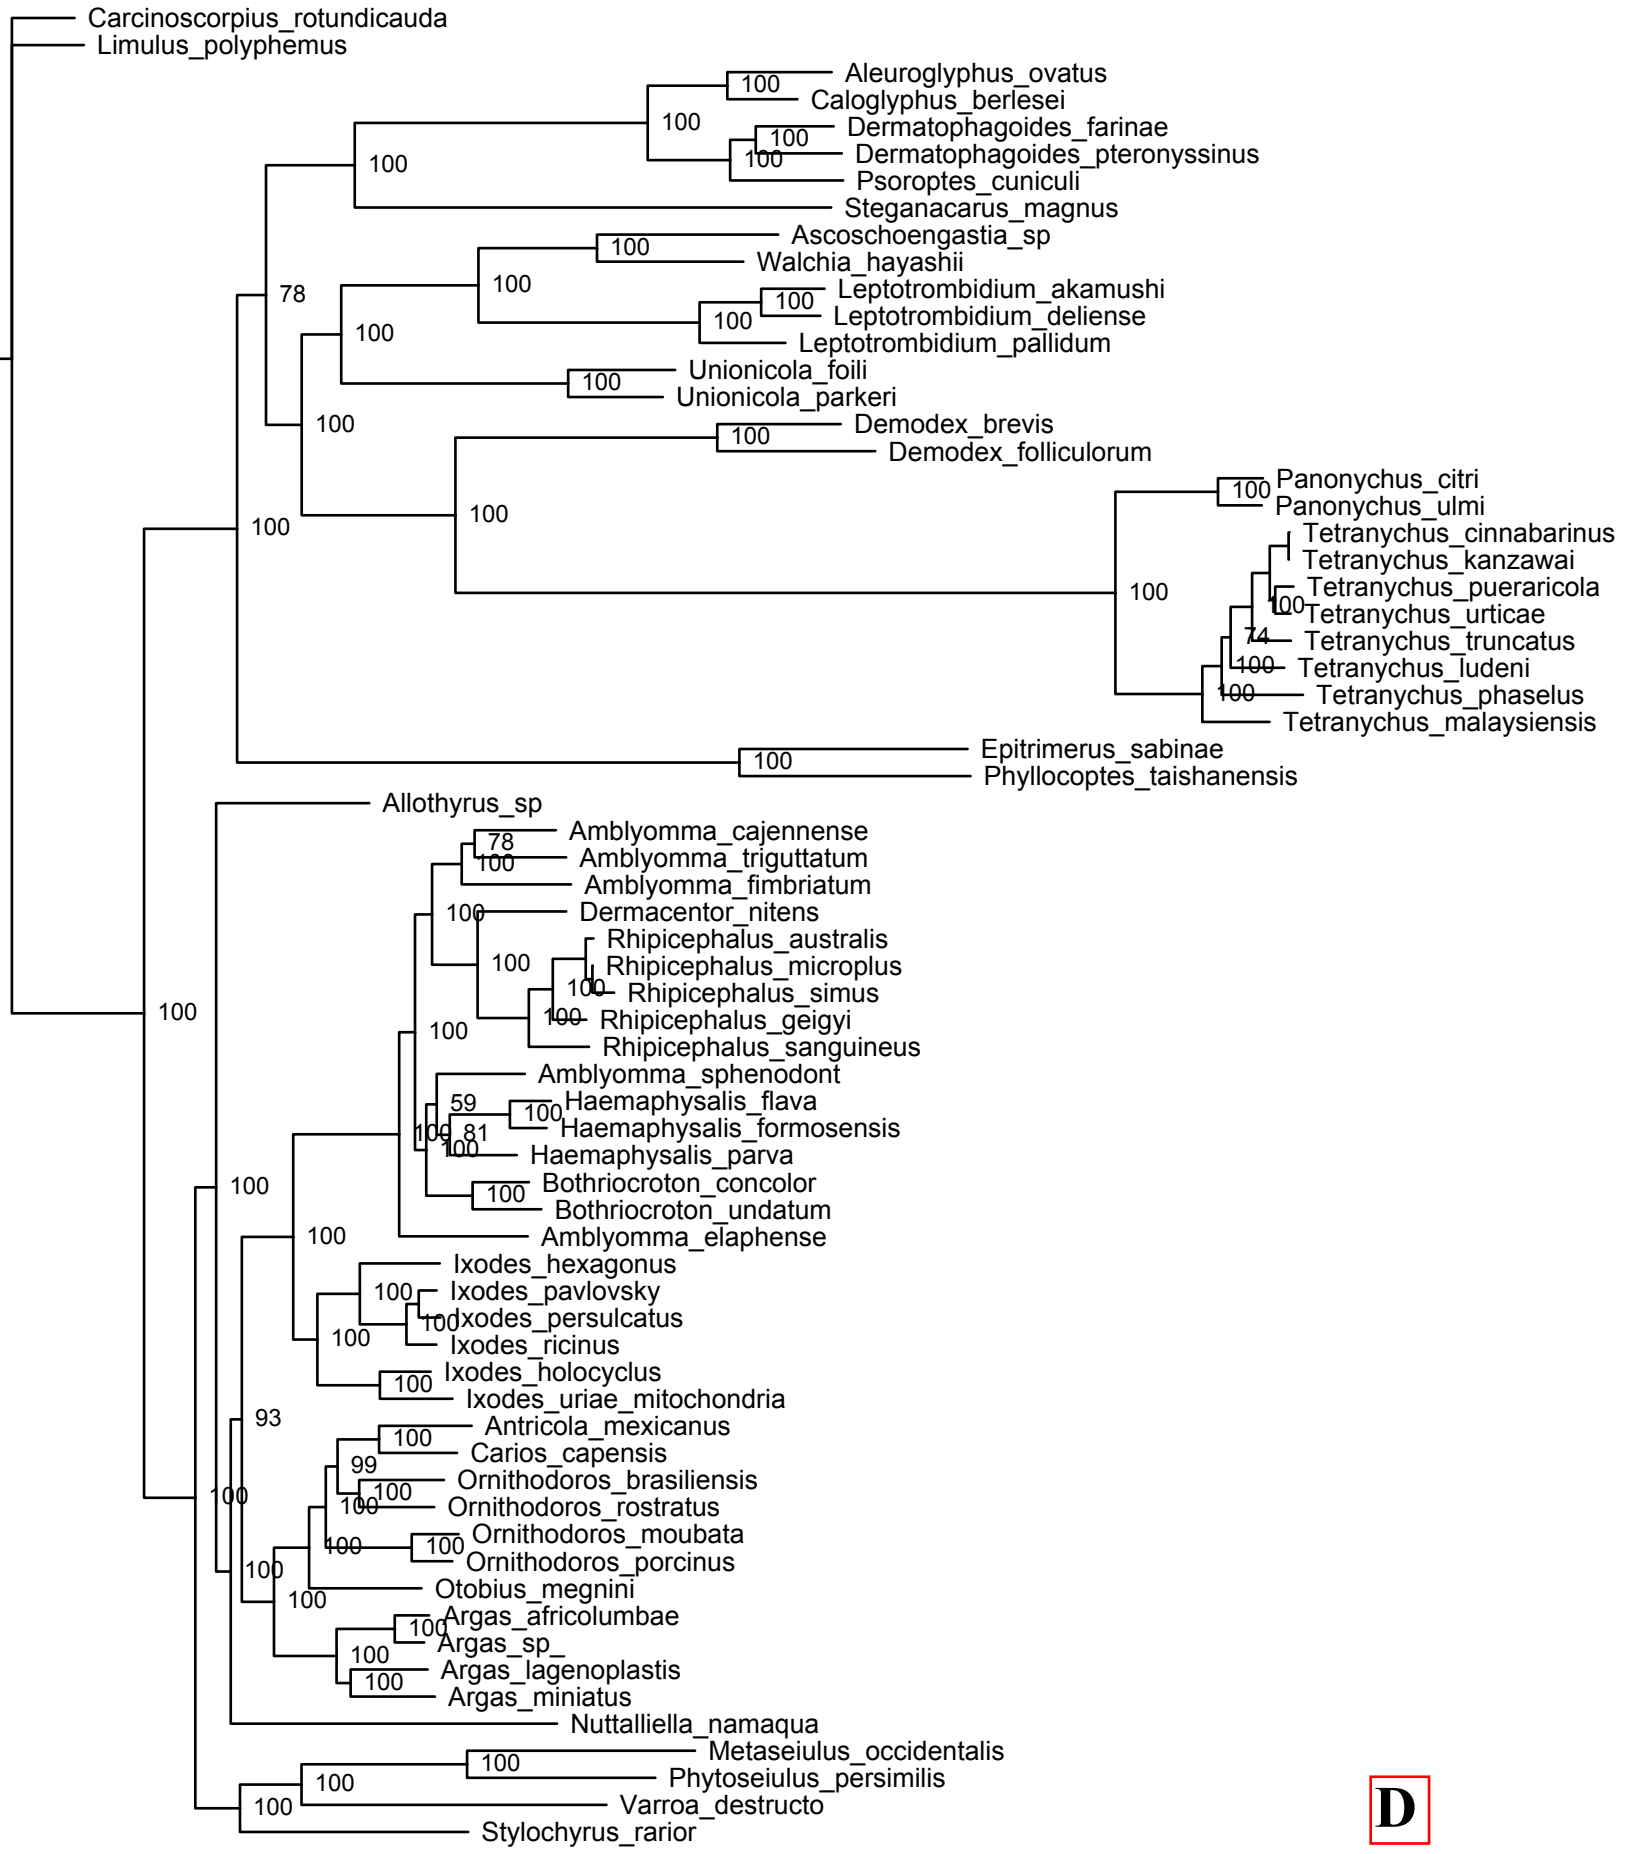

**D**

0.5

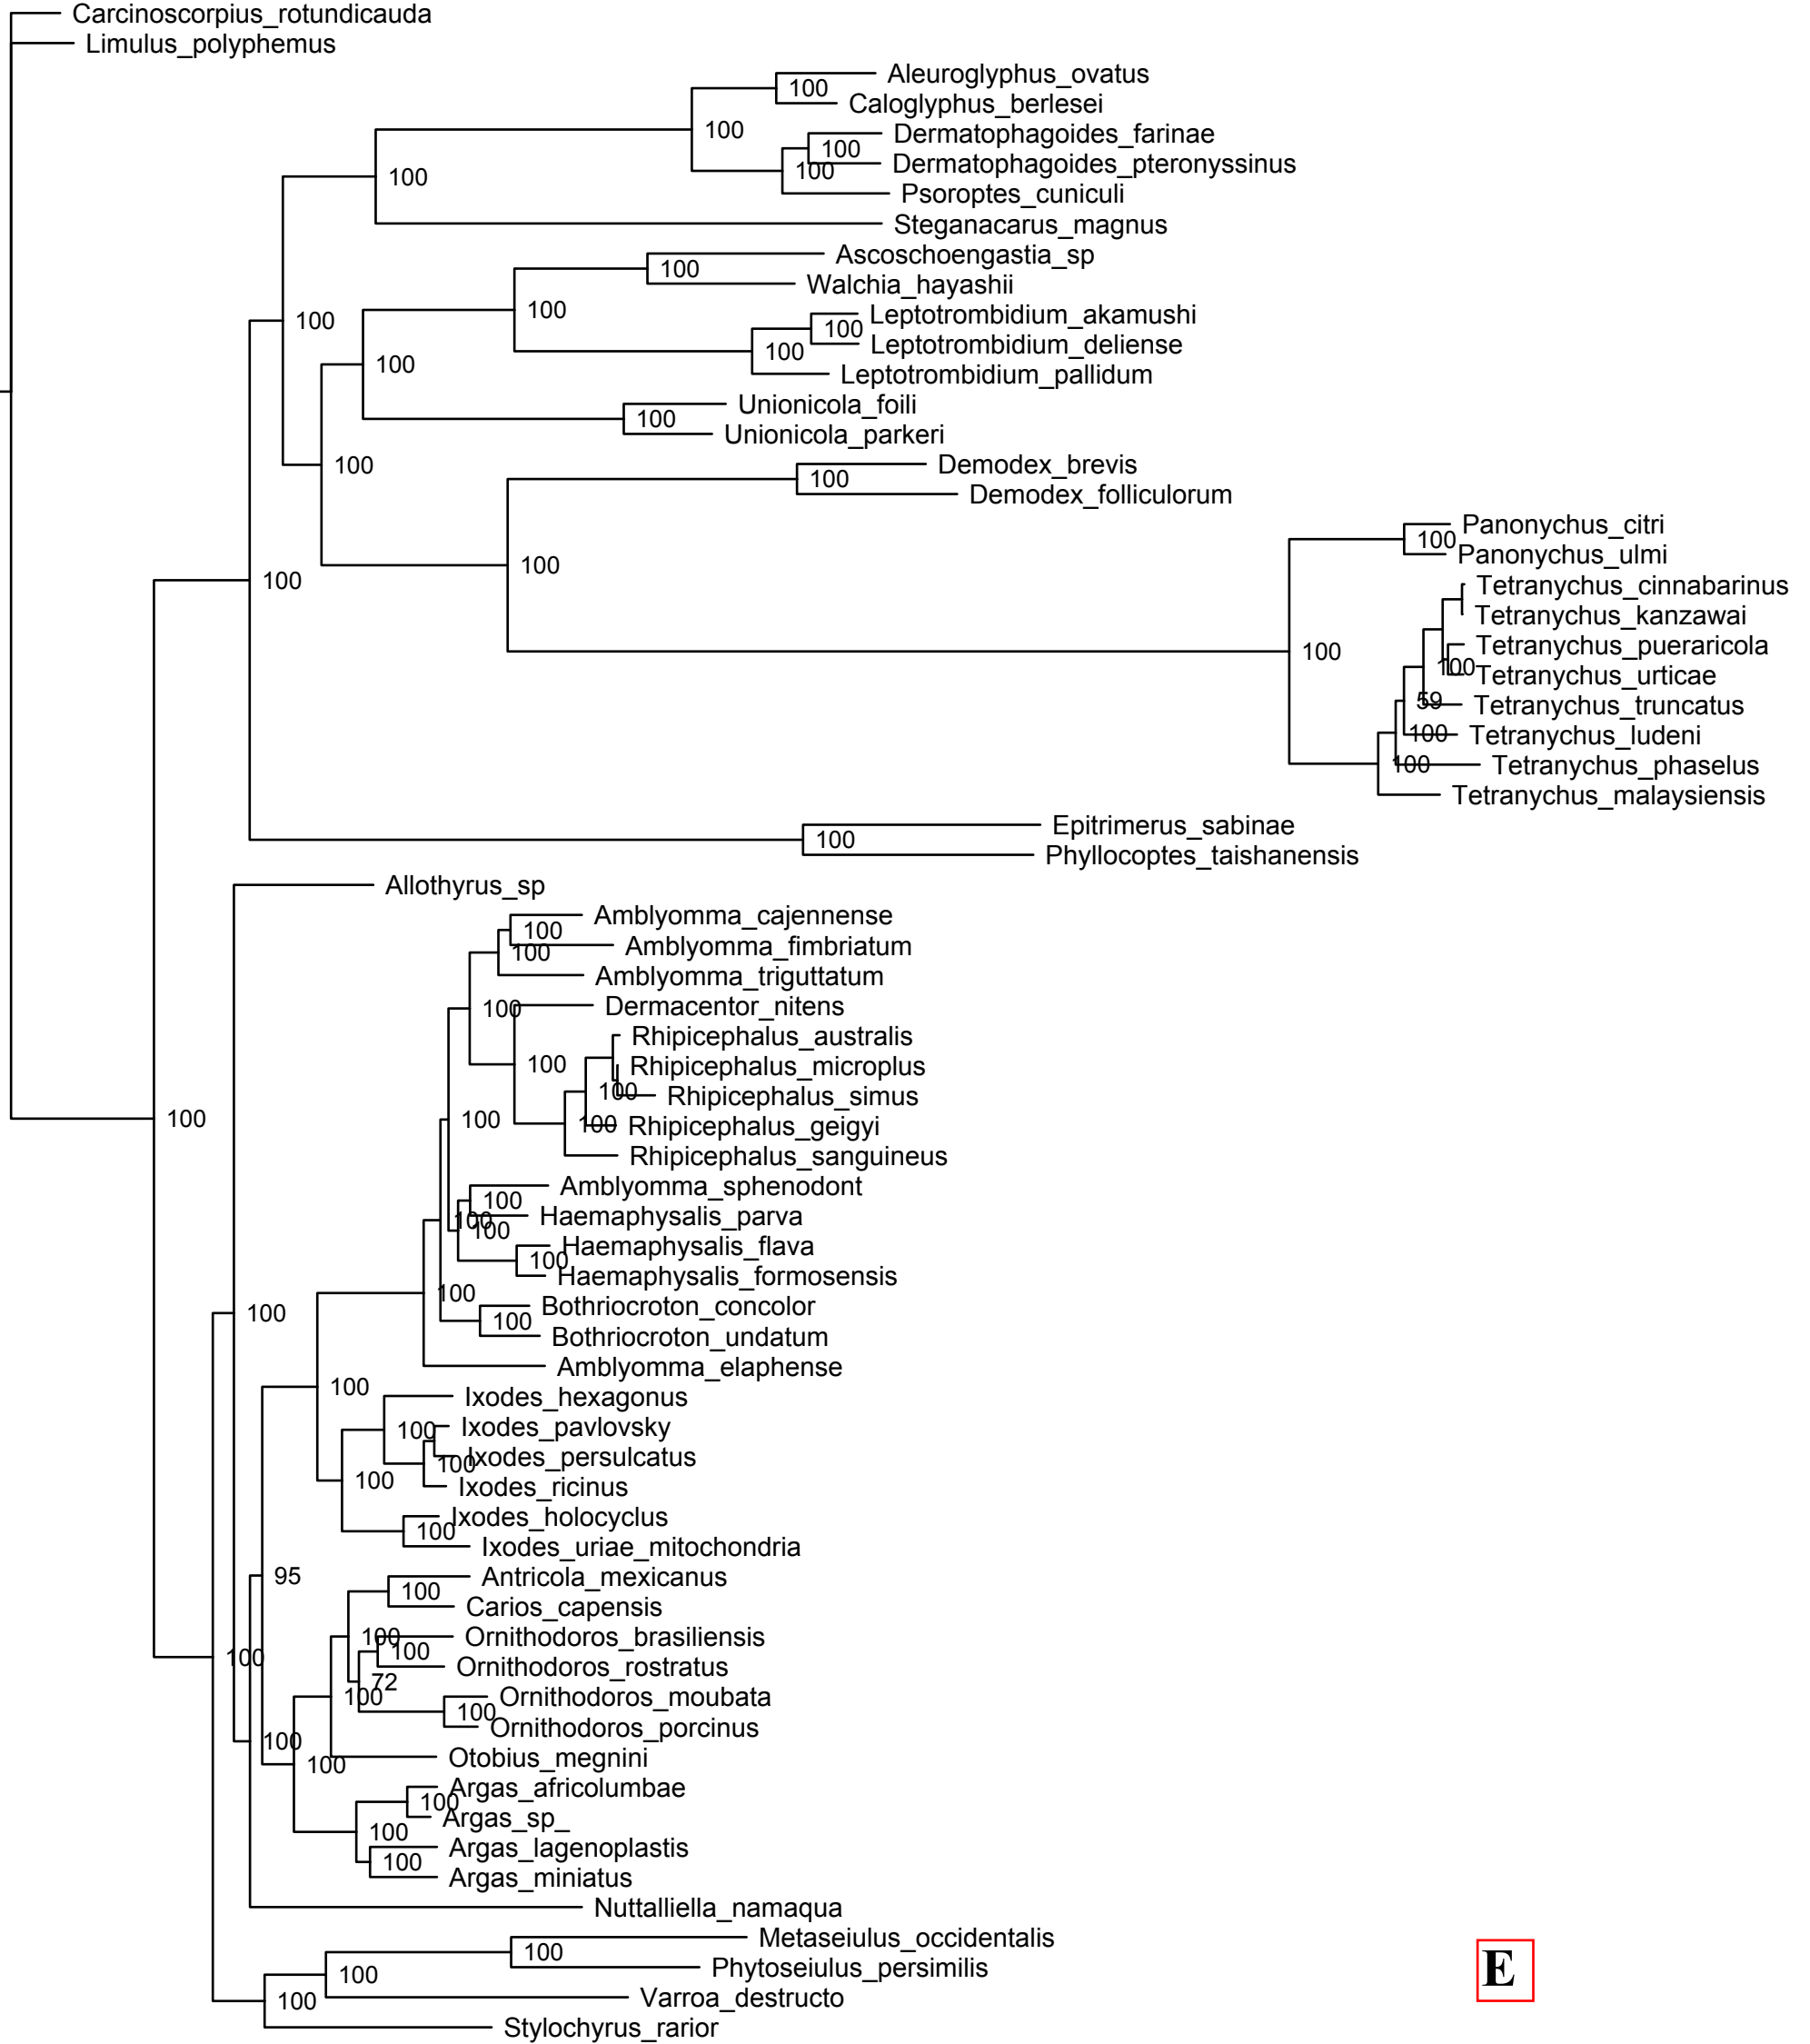

**E**

0.3

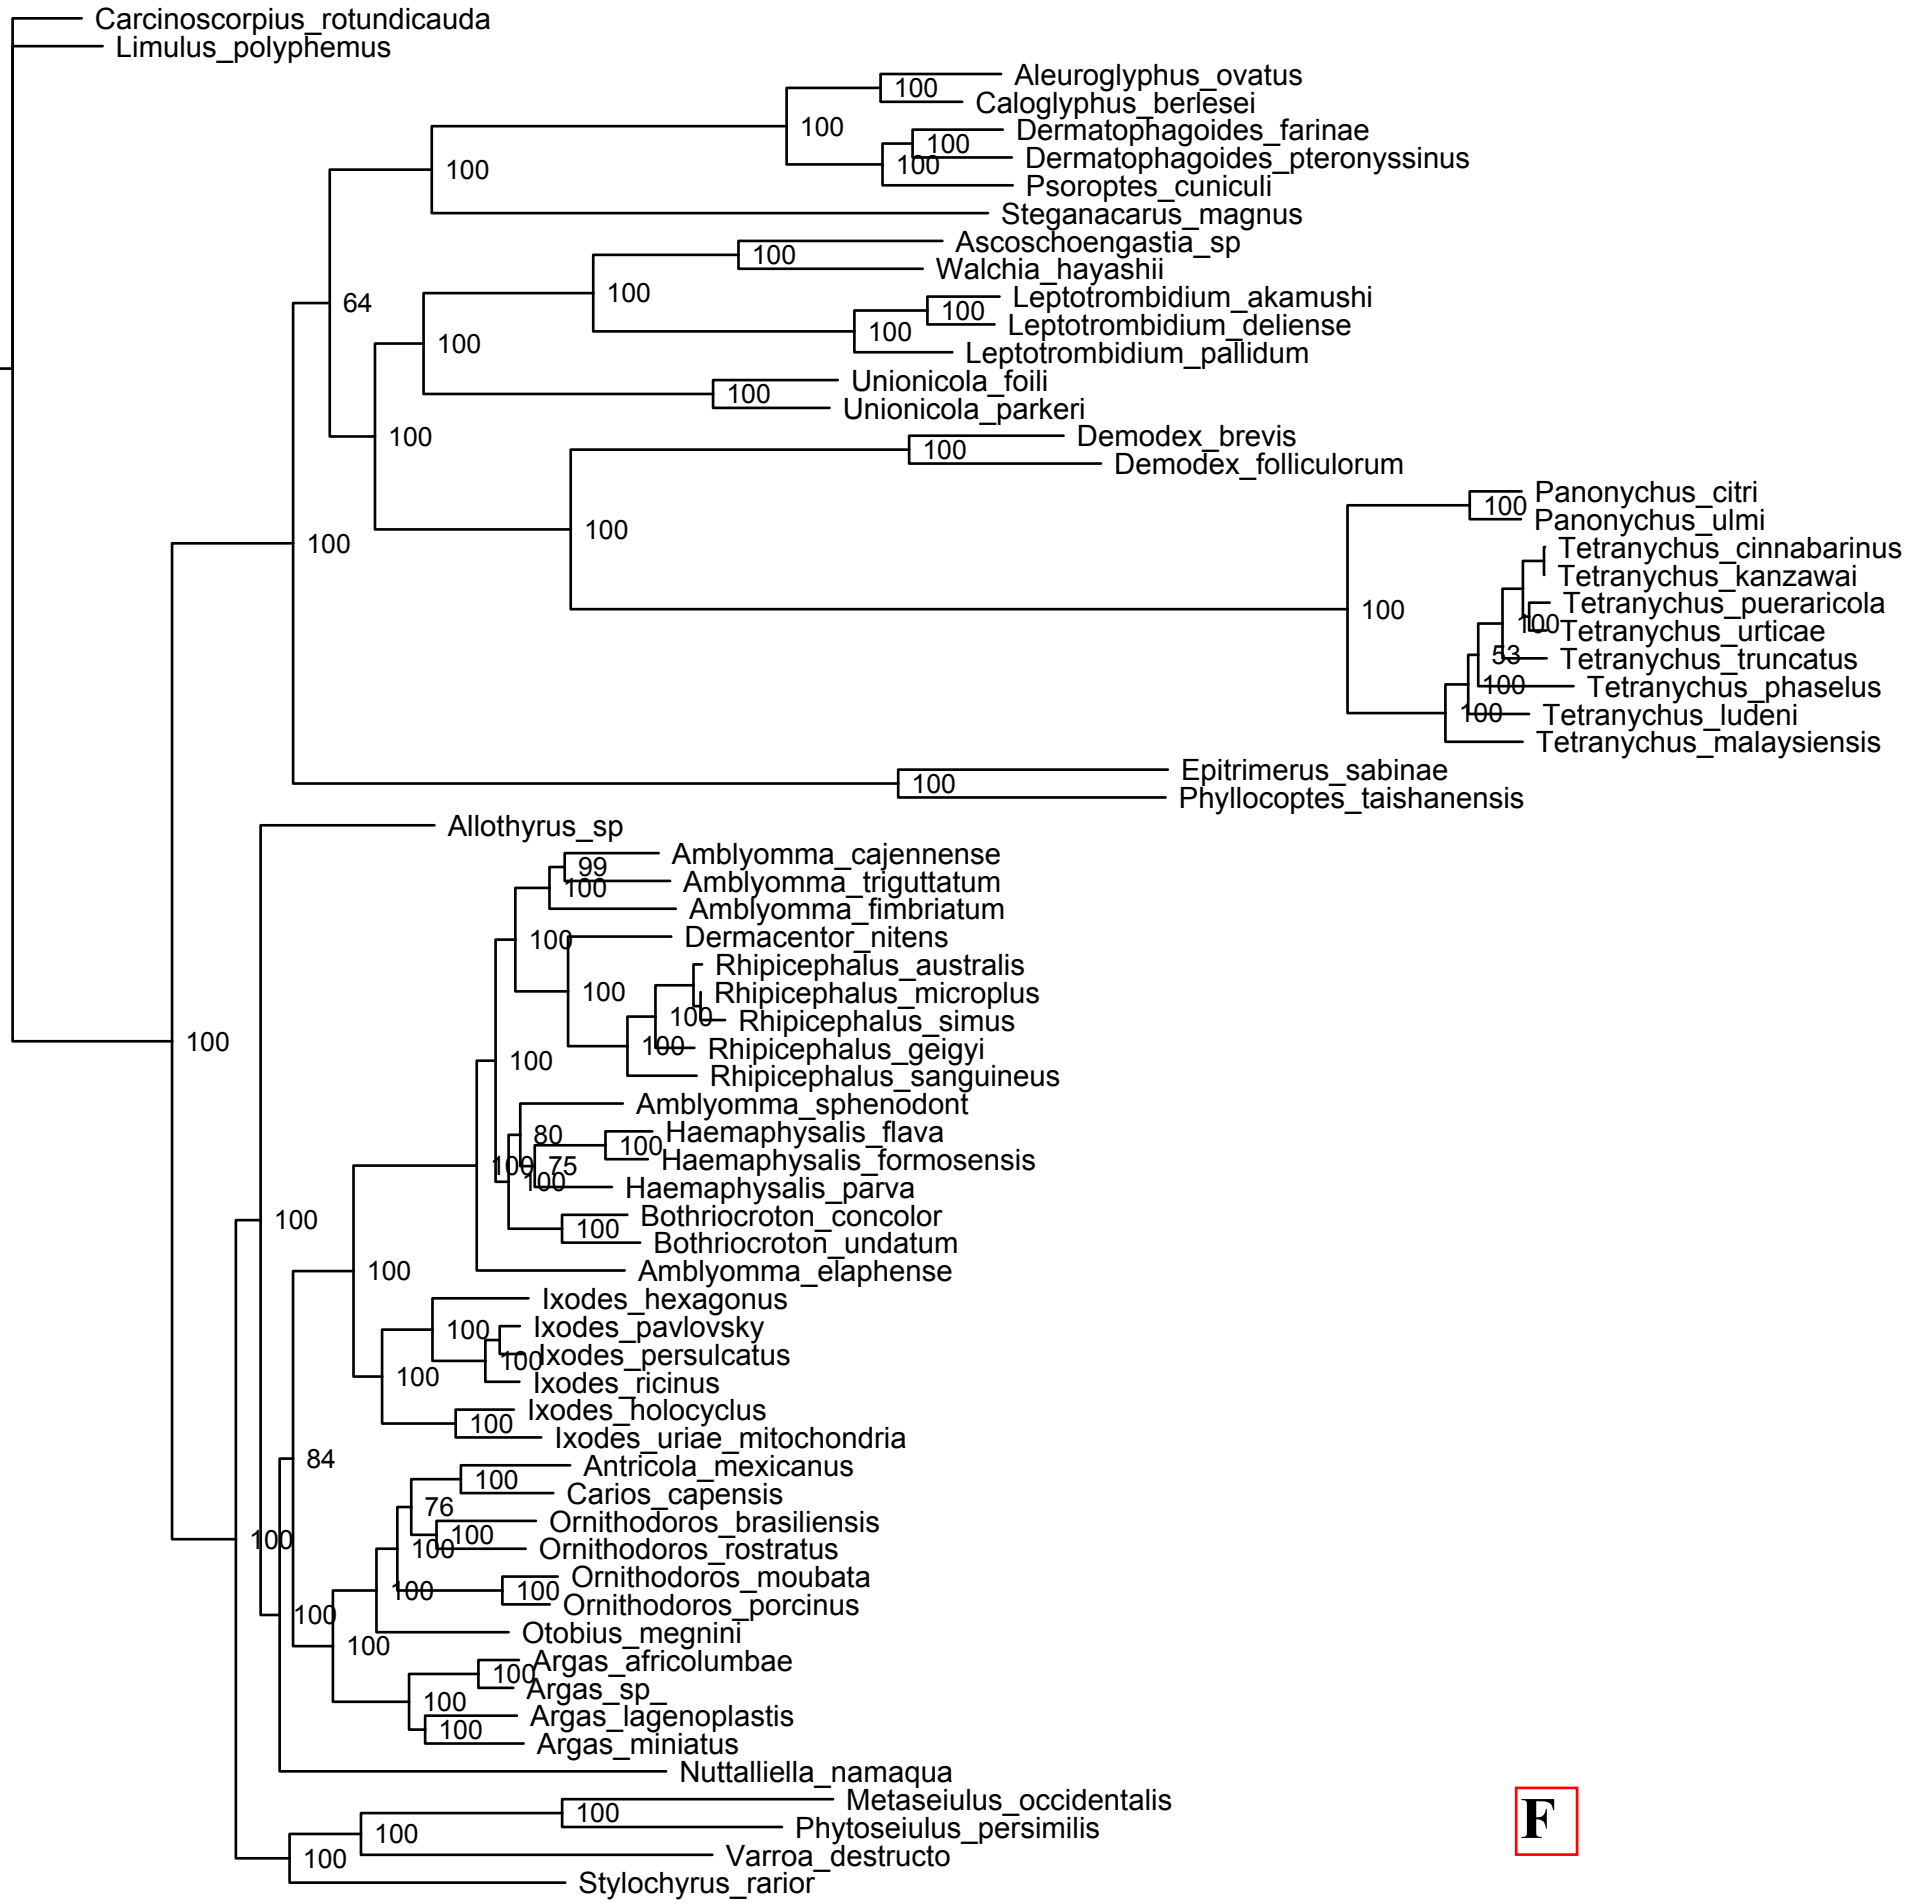

**F**

0.6

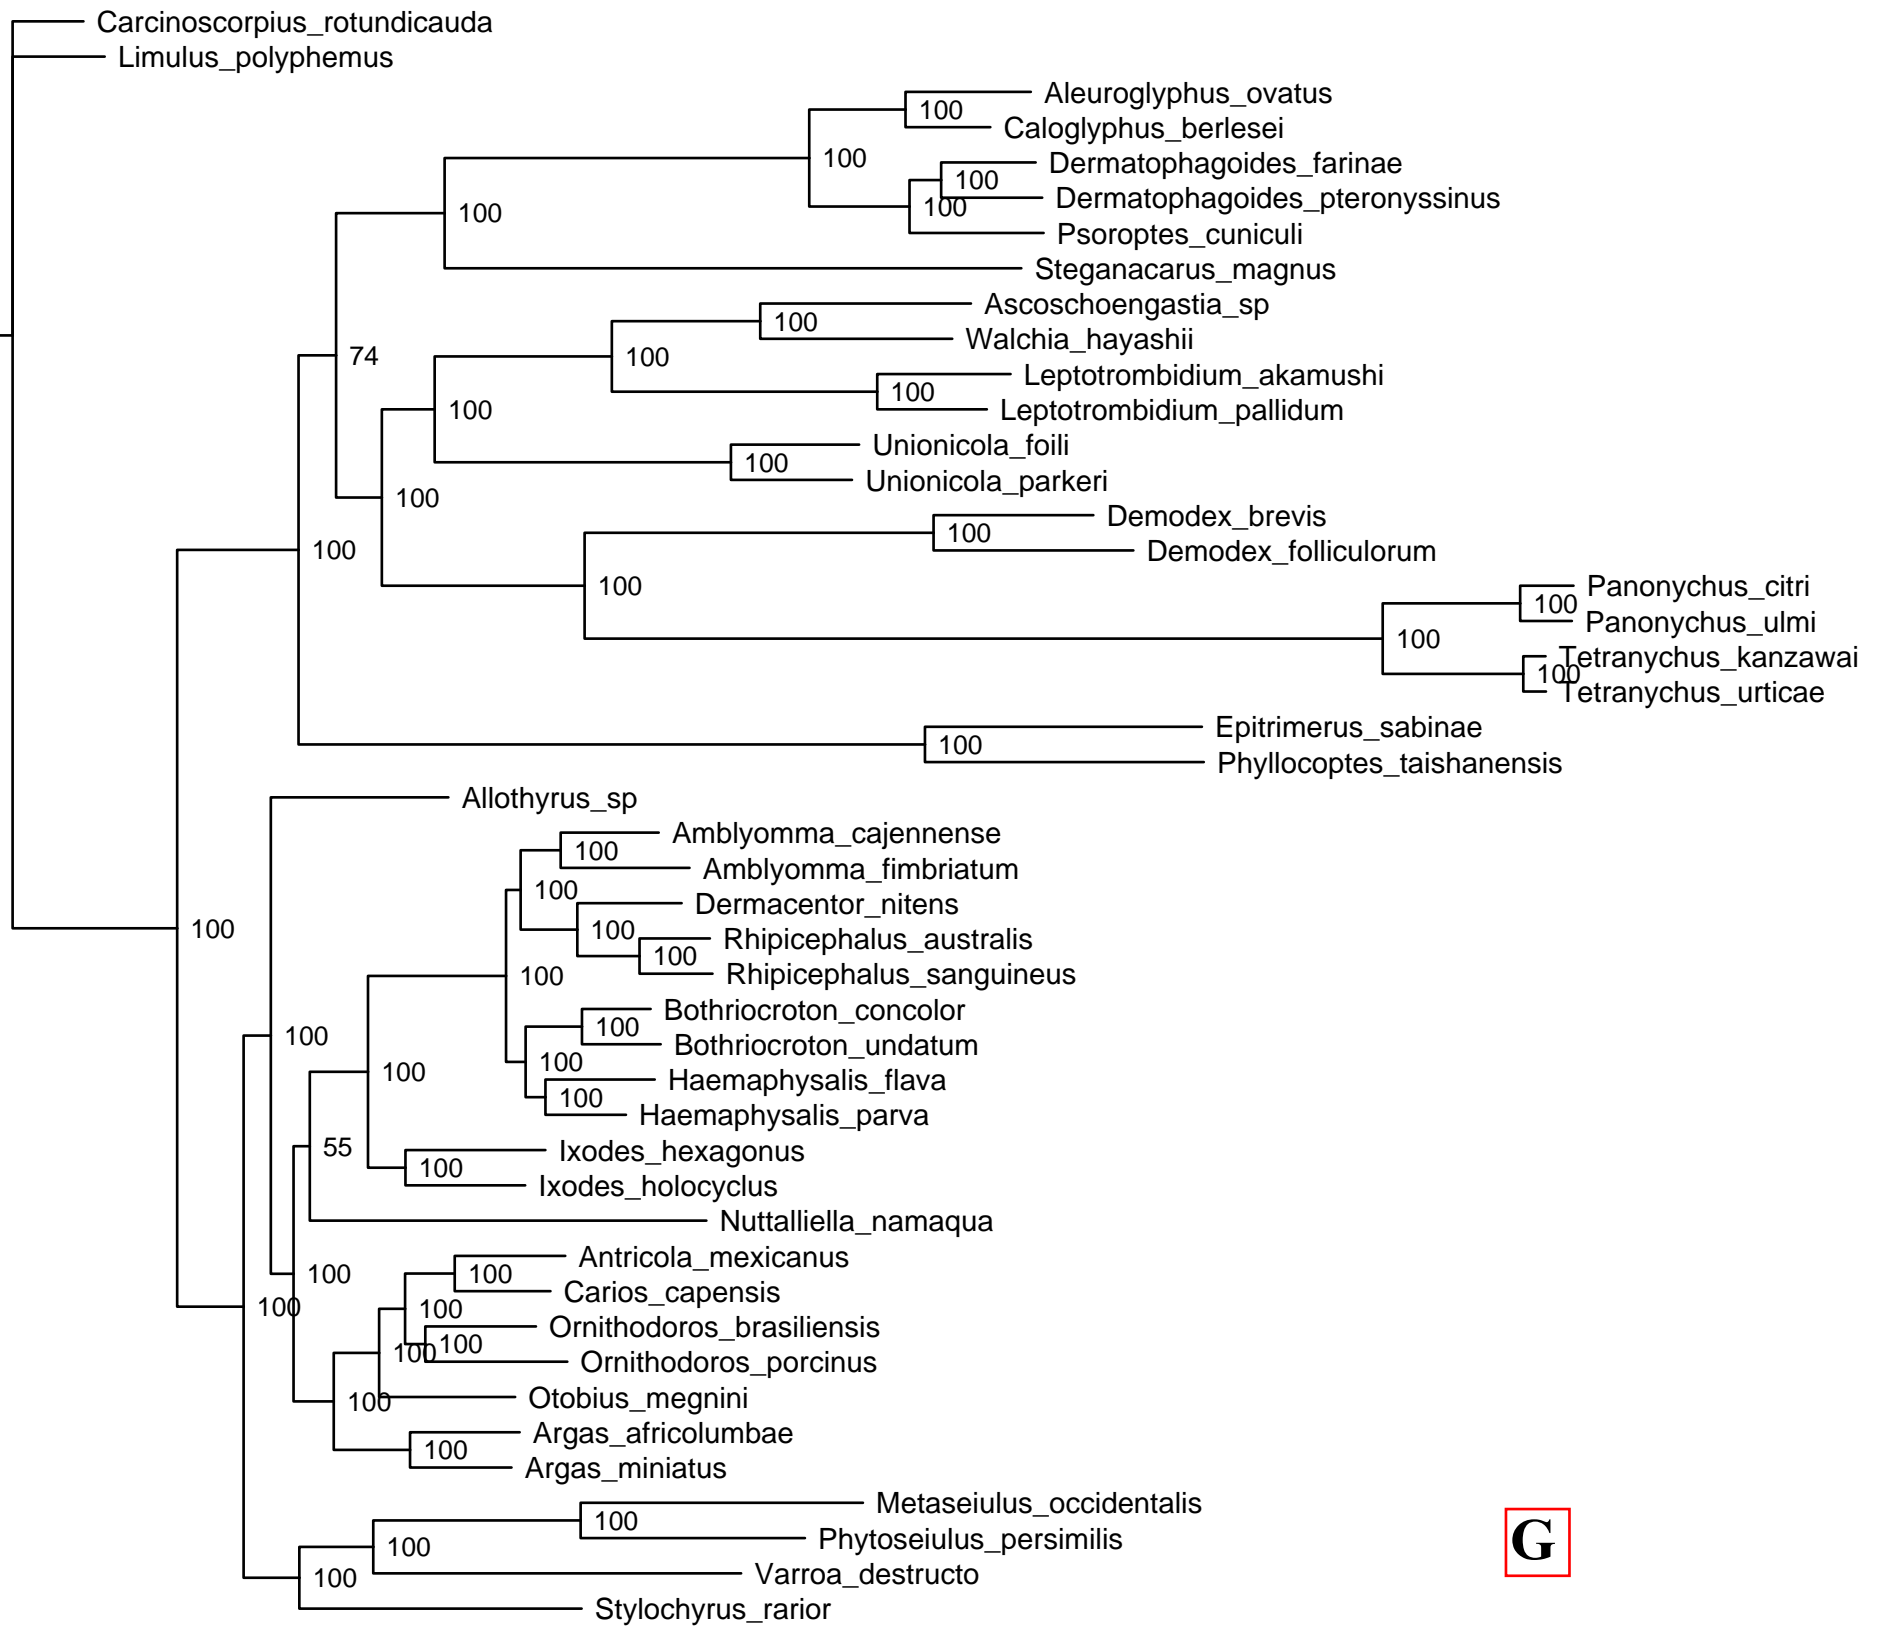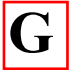

0.7



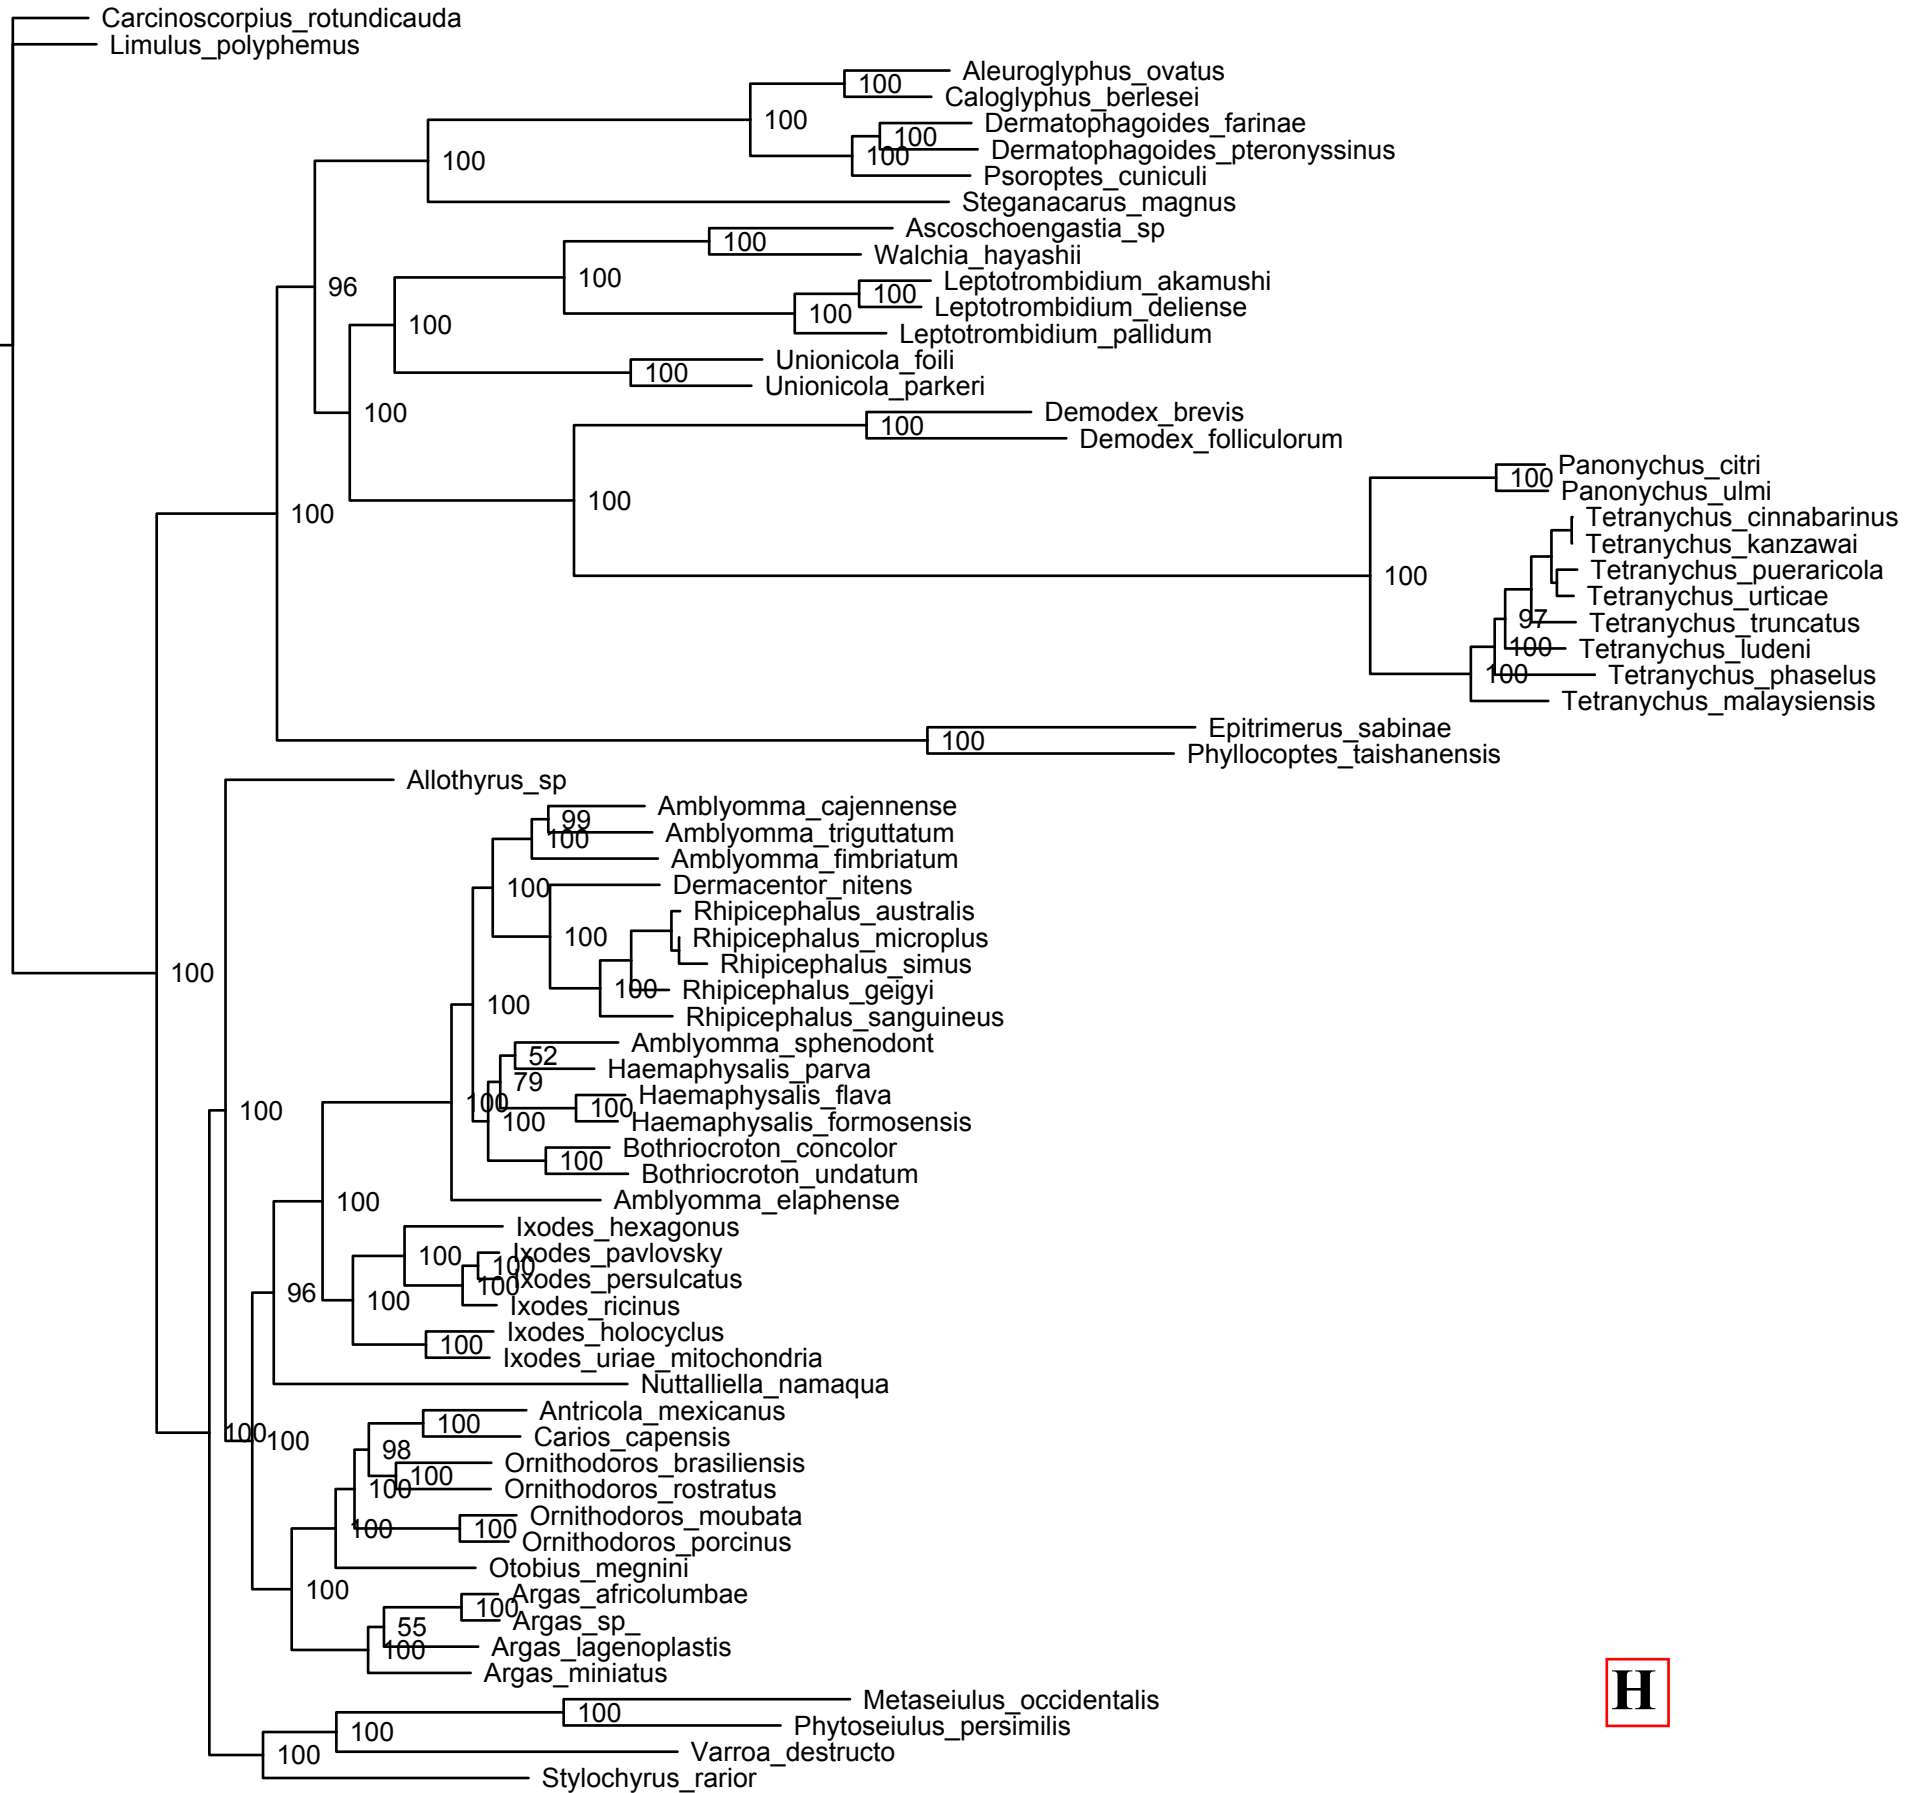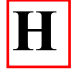

0.7

Carcinoscorpius\_ruficauda  
Limulus\_polyphemus

Outgroups

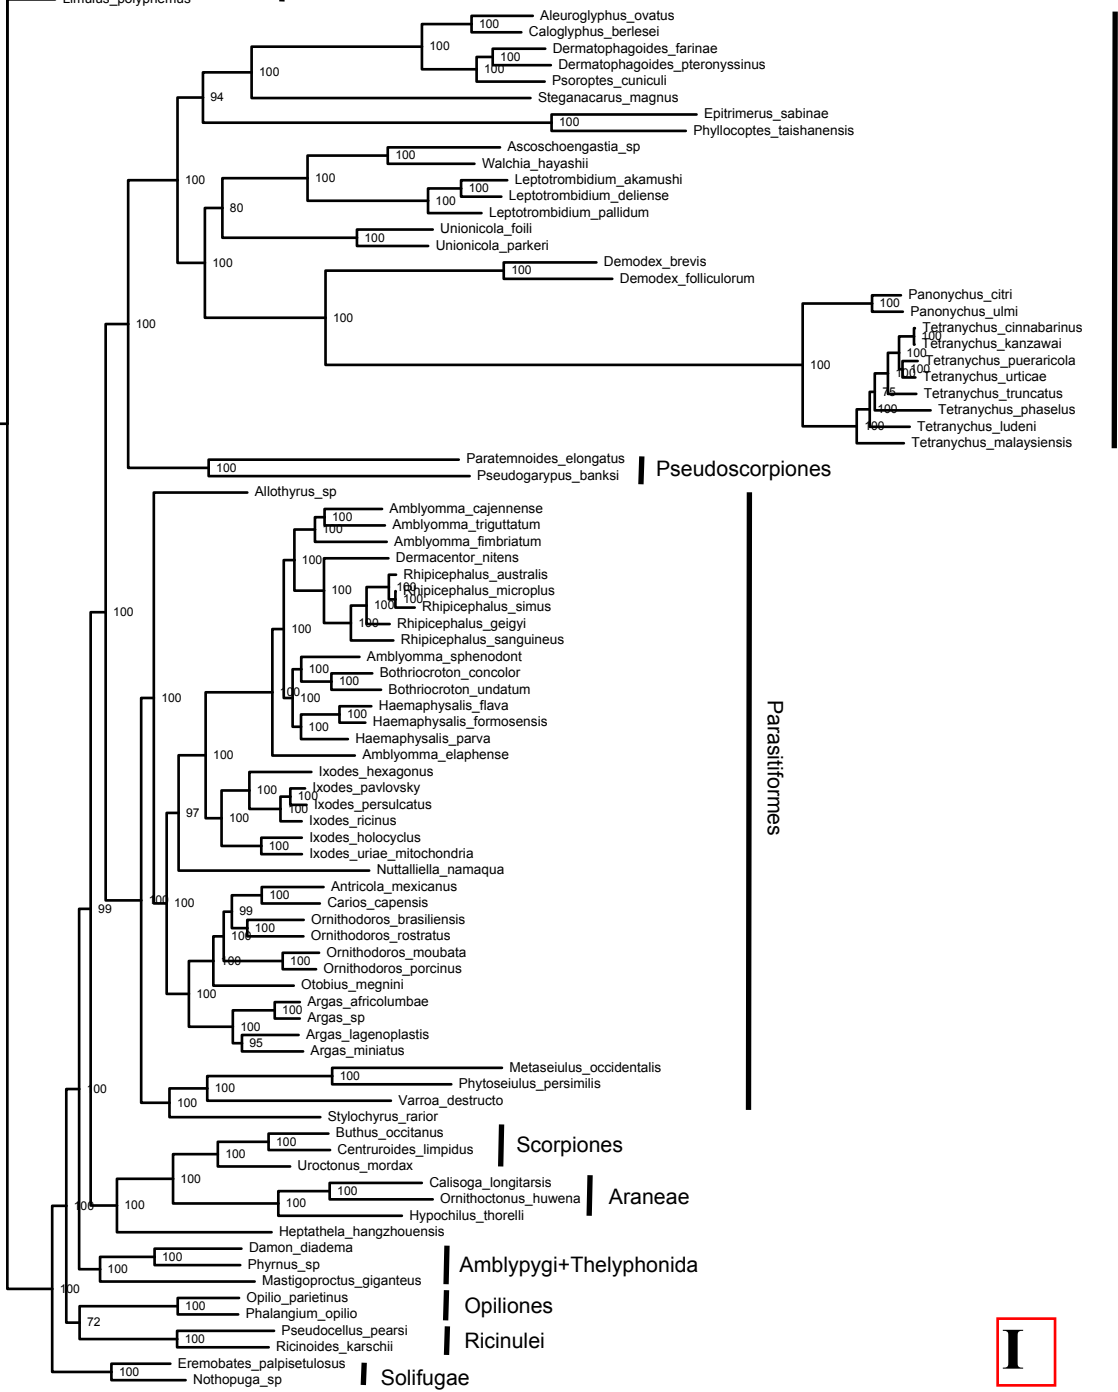

Acariformes

Parasitiformes

Scorpiones

Araneae

Amblypygi+Thelyphonida

Opiliones

Ricinulei

Solifugae

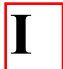

**Supplementary Table S1** D- or T-ram loss of tRNAs in the Acariformes.

| Family         | Species                               | A | C | D | E | F | G | H | I | K | L <sub>1</sub> | L <sub>2</sub> | M | N | P | Q | R | S <sub>1</sub> | S <sub>2</sub> | T | V | W | Y |
|----------------|---------------------------------------|---|---|---|---|---|---|---|---|---|----------------|----------------|---|---|---|---|---|----------------|----------------|---|---|---|---|
| Eriophyidae    | <i>Phyllocoptes taishanensis</i>      | ┆ | ┆ | ┆ | ┆ | ┆ | + | ┆ | ┆ | + | +              | +              | + | ┆ | ┆ | ┆ | ┆ | ┆              | ┆              | ┆ | ┆ | + | ┆ |
|                | <i>Epitrimerus sabiniae</i>           | ┆ | ┆ | ┆ | ┆ | ┆ | + | ┆ | ┆ | + | +              | +              | + | ┆ | ┆ | ┆ | ┆ | ┆              | ┆              | ┆ | ┆ | + | ┆ |
| Tetranychidae  | <i>Panonychus citri</i>               | ┆ | ┆ | ┆ | ┆ | ┆ | ┆ | ┆ | ┆ | + | ┆              | +              | ┆ | + | ┆ | ┆ | ┆ | ┆              | ┆              | ┆ | ┆ | ┆ | ┆ |
|                | <i>Panonychus ulmi</i>                | ┆ | ┆ | ┆ | ┆ | ┆ | ┆ | ┆ | ┆ | + | ┆              | +              | ┆ | + | ┆ | ┆ | ┆ | ┆              | ┆              | ┆ | ┆ | ┆ | ┆ |
|                | <i>Tetranychus truncates</i>          | ┆ | ┆ | ┆ | ┆ | ┆ | ┆ | ┆ | ┆ | + | ┆              | +              | ┆ | + | ┆ | ┆ | ┆ | ┆              | ┆              | ┆ | ┆ | ┆ | ┆ |
|                | <i>Tetranychus urticae</i>            | ┆ | ┆ | ┆ | ┆ | ┆ | ┆ | ┆ | ┆ | + | ┆              | +              | ┆ | + | ┆ | ┆ | ┆ | ┆              | ┆              | ┆ | ┆ | ┆ | ┆ |
|                | <i>Tetranychus kanzawai</i>           | ┆ | ┆ | ┆ | ┆ | ┆ | ┆ | ┆ | ┆ | + | ┆              | +              | ┆ | + | ┆ | ┆ | ┆ | ┆              | ┆              | ┆ | ┆ | ┆ | ┆ |
|                | <i>Tetranychus ludeni</i>             | ┆ | ┆ | ┆ | ┆ | ┆ | ┆ | ┆ | ┆ | + | ┆              | +              | ┆ | + | ┆ | ┆ | ┆ | ┆              | ┆              | ┆ | ┆ | ┆ | ┆ |
|                | <i>Tetranychus malaysiensis</i>       | ┆ | ┆ | ┆ | ┆ | ┆ | ┆ | ┆ | ┆ | + | ┆              | +              | ┆ | + | ┆ | ┆ | ┆ | ┆              | ┆              | ┆ | ┆ | ┆ | ┆ |
|                | <i>Tetranychus phaselus</i>           | ┆ | ┆ | ┆ | ┆ | ┆ | ┆ | ┆ | ┆ | + | ┆              | +              | ┆ | + | ┆ | ┆ | ┆ | ┆              | ┆              | ┆ | ┆ | ┆ | ┆ |
|                | <i>Tetranychus pueraricola</i>        | ┆ | ┆ | ┆ | ┆ | ┆ | ┆ | ┆ | ┆ | + | ┆              | +              | ┆ | + | ┆ | ┆ | ┆ | ┆              | ┆              | ┆ | ┆ | ┆ | ┆ |
| Demodicidae    | <i>Demodex brevis</i>                 | ┆ | ┆ | ┆ | + | ┆ | ┆ | ┆ | ┆ | + | ┆              | +              | + | + | ┆ | + | ┆ | ┆              | ┆              | ┆ | ┆ | + | ┆ |
|                | <i>Demodex folliculorum</i>           | ┆ | ┆ | ┆ | + | ┆ | ┆ | ┆ | ┆ | + | ┆              | +              | + | + | ┆ | + | ┆ | ┆              | ┆              | ┆ | ┆ | + | ┆ |
| Trombiculidae  | <i>Leptotrombidium pallidum</i>       | ┆ | ┆ | + | + | ┆ | ┆ | ┆ | ┆ | + | ┆              | ┆              | + | ┆ | ┆ | ┆ | ┆ | ┆              | ┆              | ┆ | ┆ | ┆ | ┆ |
|                | <i>Leptotrombidium akamushi</i>       | ┆ | ┆ | + | + | ┆ | ┆ | ┆ | ┆ | + | ┆              | +              | + | ┆ | ┆ | ┆ | ┆ | ┆              | ┆              | ┆ | ┆ | ┆ | ┆ |
|                | <i>Leptotrombidium deliense</i>       | ┆ | ┆ | + | + | ┆ | ┆ | ┆ | ┆ | + | ┆              | +              | + | ┆ | ┆ | ┆ | ┆ | ┆              | ┆              | ┆ | ┆ | ┆ | ┆ |
|                | <i>Walchia hayashii</i>               | ┆ | ┆ | + | + | ┆ | ┆ | ┆ | ┆ | + | ┆              | +              | + | ┆ | ┆ | ┆ | ┆ | ┆              | ┆              | ┆ | ┆ | ┆ | ┆ |
| Unionicolidae  | <i>Unionicola foili</i>               | ┆ | ┆ | + | ┆ | ┆ | ┆ | ┆ | ┆ | + | +              | +              | + | ┆ | ┆ | ┆ | ┆ | ┆              | ┆              | ┆ | ┆ | ┆ | ┆ |
|                | <i>Unionicola parkeri</i>             | ┆ | ┆ | + | ┆ | ┆ | ┆ | ┆ | ┆ | + | +              | +              | + | ┆ | ┆ | ┆ | ┆ | ┆              | ┆              | ┆ | ┆ | ┆ | ┆ |
| Acaridae       | <i>Aleuroglyphus ovatus</i>           | ┆ | ┆ | ┆ | ┆ | ┆ | ┆ | ┆ | ┆ | + | ┆              | ┆              | ┆ | ┆ | ┆ | ┆ | ┆ | ┆              | ┆              | ┆ | ┆ | ┆ | ┆ |
|                | <i>Caloglyphus berlesei</i>           | ┆ | ┆ | ┆ | ┆ | ┆ | ┆ | ┆ | ┆ | + | ┆              | ┆              | ┆ | ┆ | ┆ | ┆ | ┆ | ┆              | ┆              | ┆ | ┆ | ┆ | ┆ |
| Pyroglyphidae  | <i>Dermatophagoides pteronyssinus</i> | ┆ | ┆ | ┆ | ┆ | ┆ | ┆ | ┆ | ┆ | + | ┆              | ┆              | ┆ | ┆ | ┆ | ┆ | ┆ | ┆              | ┆              | ┆ | ┆ | ┆ | ┆ |
|                | <i>Dermatophagoides farinae</i>       | ┆ | ┆ | ┆ | ┆ | ┆ | ┆ | ┆ | ┆ | + | ┆              | ┆              | ┆ | ┆ | ┆ | ┆ | ┆ | ┆              | ┆              | ┆ | ┆ | ┆ | ┆ |
| Steganacaridae | <i>Steganacarus magnus</i>            | - | - | - | - | - | - | ┆ | - | - | -              | ┆              | - | - | ┆ | ┆ | - | -              | ┆              | - | - | ┆ | - |

Psoroptidae *Psoroptes cuniculi*

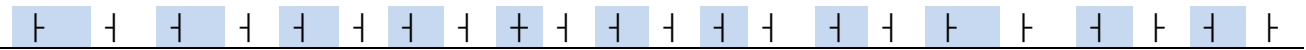

“T” means D-armless, “T” means T-armless, “T” means both T-armless and D-armless, “T” means typical cloverleaf structure, “-” means tRNA gene loss, tRNA genes are indicated by the single letter IUPAC-IUB abbreviation for their corresponding amino acid. Unpublished data of *Ascoschoengastia* sp. was not included in this analysis.

**Supplementary Table S2** PCR primers used in this study.

| Primer      | Sequence (5'-3')                  | Source               |
|-------------|-----------------------------------|----------------------|
| LR-J-122887 | CCGGTCTGAACTCAGATCACGT            | Simon et al. (1994)  |
| LR-N-13398  | CGCCTGTTTAACAAAAACAT              | Simon et al. (1994)  |
| LCO1490     | GGTCAACAAATCATAAAGATATTGG         | Folmer et al. (1994) |
| HCO2198     | TAAACTTCAGGGTGACCAAAAAATCA        | Folmer et al. (1994) |
| ECOISR3     | CCGACAAATCCGTATGAAATAAGACACC      | This study           |
| E16SSR2     | ACCTATTCTACAAGAGTTTGCGACC         | This study           |
| PF2         | GCAGGTCAGAATCAAGACAAACAATAACAAA   | This study           |
| PR2         | TCCCTTTGATGCTAGGTGCCACGATAT       | This study           |
| TY16sR1     | TGAAATAACACAAAATAATAAACTACTT      | This study           |
| TYCB3R2     | ATCGTGAAACGCTAAAGAACCAGGCT        | This study           |
| RTY16sF4    | AGATTAACTTGTAGGGTCTTCTCGTCTTGCCAG | This study           |
| RTYCB3F5    | TTGGCCGGGGCGATTACTATGCTTCTAACGGA  | This study           |

**Supplementary Table S3** Species used in this study.

| Class                  | Superorder               | Order         | Superfamily                   | Family                       | Species                             | GenBank number                  | Size (bp)                      | Reference                      |                             |
|------------------------|--------------------------|---------------|-------------------------------|------------------------------|-------------------------------------|---------------------------------|--------------------------------|--------------------------------|-----------------------------|
| Merostomata            |                          | Xiphosura     |                               | Limulidae                    | <i>Limulus polyphemus</i>           | AF216203                        | 14,985                         | Lavrov et al. 2000             |                             |
|                        |                          |               |                               |                              | <i>Carcinoscorpius rotundicauda</i> | JX437074                        | 15,037                         | Unpublished                    |                             |
| Arachnida              | Amblypygi                |               |                               | Phrynidae                    | <i>Phyrnus</i> sp.                  | EU520641                        | 14,764                         | Masta and Boore, 2008          |                             |
|                        |                          |               |                               |                              | <i>Damon diadema</i>                | NC_011293                       | 14,786                         | Unpublished                    |                             |
|                        |                          |               |                               | Araneae                      | Nemesiidae                          | <i>Calisoga longitarsis</i>     | EU523754                       | 14,070                         | Masta and Boore, 2008       |
|                        |                          |               |                               |                              | Hypochilidae                        | <i>Hypochilus thorelli</i>      | EU523753                       | 13,991                         | Masta and Boore, 2008       |
|                        |                          |               |                               |                              | Heptathelidae                       | <i>Heptathela hangzhouensis</i> | AY309258                       | 14,215                         | Qiu et al., 2005            |
|                        |                          |               |                               | Opiliones                    |                                     |                                 | Phalangiidae                   | <i>Phalangium opilio</i>       | EU523757                    |
|                        | <i>Opilio parietinus</i> | NC_014700     | 15,400                        |                              |                                     |                                 |                                | Podsiadlowski and Fahrei, 2010 |                             |
|                        | Scorpiones               |               | Buthidae                      |                              |                                     |                                 |                                | <i>Buthus occitanus</i>        | EU523755                    |
|                        |                          |               |                               | <i>Centruroides limpidus</i> | NC_006896                           | 14,519                          | Dávila et al., 2005            |                                |                             |
|                        |                          |               |                               | Chactidae                    | <i>Uroctonus mordax</i>             | EU523756                        | 14,840                         | Masta and Boore, 2008          |                             |
|                        | Solifugae                |               |                               | Eremobatidae                 | <i>Eremobates palpisetulosus</i>    | EU520642                        | 15,083                         | Masta and Boore, 2008          |                             |
|                        |                          |               |                               |                              | Ammotrechidae                       | <i>Nothopuga</i> sp.            | NC_009984                      | 14,985                         | Fahrein et al., 2007        |
|                        | Thelyphonida             |               |                               |                              | Thelyphonidae                       | <i>Mastigoproctus giganteus</i> | EU520643                       | 14,416                         | Masta and Boore, 2008       |
|                        | Pseudoscorpiones         |               |                               |                              | Fealloidea                          | <i>Pseudogarypus banksi</i>     | JQ040544                       | 16,546                         | Ovchinnikov and Masta, 2012 |
|                        |                          |               |                               |                              |                                     | Cheliferoidea                   | <i>Paratemnoides elongatus</i> | JQ040543                       | 14,368                      |
| Ricinulei              |                          |               |                               |                              |                                     |                                 |                                | <i>Pseudocellus pearsi</i>     | NC_009985                   |
| Parasitiformes         | Holothyrida              | Holothyroidea |                               | Ricinoididae                 | <i>Ricinoides karschii</i>          | NC_023452                       | 14,614                         | Unpublished                    |                             |
|                        |                          |               |                               | Allothyridae                 | <i>Allothyrus</i> sp.               | KC769586                        | 14,578                         | Burger et al. 2014             |                             |
|                        |                          |               |                               |                              | Ixodida                             | Ixodoidea                       | Argasidae                      | <i>Antricola mexicanus</i>     | KC769591                    |
| <i>Argas africanus</i> | JQ665720                 | 14,440        | Mans et al. 2012(Mans et al., |                              |                                     |                                 |                                |                                |                             |

|          |                                    |          |        | 2012)                       |
|----------|------------------------------------|----------|--------|-----------------------------|
|          | <i>Argas lagenoplastis</i> *       | KC769587 | 14,478 | Burger <i>et al.</i> 2014   |
|          | <i>Argas miniatus</i>              | KC769590 | 14,416 | Burger <i>et al.</i> 2014   |
|          | <i>Argas sp.*</i>                  | KC769588 | 14,450 | Burger <i>et al.</i> 2014   |
|          | <i>Carios capensis</i>             | AB075953 | 14,418 | Shao <i>et al.</i> 2004     |
|          | <i>Ornithodoros brasiliensis</i>   | KC769593 | 14,489 | Burger <i>et al.</i> 2014   |
|          | <i>Ornithodoros moubata</i> *      | AB073679 | 14,398 | Shao <i>et al.</i> 2004     |
|          | <i>Ornithodoros porcinus</i>       | AB105451 | 14,378 | Shao <i>et al.</i> 2005     |
|          | <i>Ornithodoros rostratus</i> *    | KC769592 | 14,452 | Burger <i>et al.</i> 2014   |
|          | <i>Otobius megnini</i>             | KC769589 | 14,430 | Burger <i>et al.</i> 2014   |
| Ixodidae | <i>Amblyomma cajennense</i>        | JX573118 | 14,780 | Burger <i>et al.</i> 2013   |
|          | <i>Amblyomma elaphense</i> *       | JN863729 | 14,627 | Burger <i>et al.</i> 2012   |
|          | <i>Amblyomma fimbriatum</i>        | JN863729 | 14,705 | Burger <i>et al.</i> 2012   |
|          | <i>Amblyomma sphenodonti</i> *     | JN863731 | 14,772 | Burger <i>et al.</i> 2012   |
|          | <i>Amblyomma triguttatum</i> *     | AB113317 | 14,704 | Shao <i>et al.</i> 2005     |
|          | <i>Bothriocroton concolor</i>      | JN863727 | 14,809 | Burger <i>et al.</i> 2012   |
|          | <i>Bothriocroton undatum</i>       | JN863728 | 14,769 | Burger <i>et al.</i> 2012   |
|          | <i>Dermacentor nitens</i>          | KC503258 | 14,839 | Burger <i>et al.</i> 2014   |
|          | <i>Haemaphysalis flava</i>         | AB075954 | 14,686 | Shao <i>et al.</i> 2004     |
|          | <i>Haemaphysalis formosensis</i> * | JX573135 | 14,676 | Burger <i>et al.</i> 2013   |
|          | <i>Haemaphysalis parva</i>         | JX573136 | 14,846 | Burger <i>et al.</i> 2013   |
|          | <i>Ixodes hexagonus</i>            | AF081828 | 14,539 | Black & Roehrdanz, 1998     |
|          | <i>Ixodes holocyclus</i>           | AB075955 | 15,007 | Shao <i>et al.</i> 2005     |
|          | <i>Ixodes pavlovskyi</i> *         | KJ000060 | 14,575 | Unpublished                 |
|          | <i>Ixodes persulcatus</i> *        | AB073725 | 14,539 | Shao <i>et al.</i> 2005     |
|          | <i>Ixodes ricinus</i> *            | JN248424 | 14,566 | Montagna <i>et al.</i> 2012 |

|             |                |                |                 |                                   |           |        |                                |
|-------------|----------------|----------------|-----------------|-----------------------------------|-----------|--------|--------------------------------|
|             |                |                |                 | <i>Ixodes uriae</i> *             | AB087746  | 15,053 | Shao <i>et al.</i> 2005        |
|             |                |                |                 | <i>Rhipicephalus australis</i>    | KC503255  | 14,891 | Burger <i>et al.</i> 2014      |
|             |                |                |                 | <i>Rhipicephalus geigy</i> *      | KC503263  | 14,948 | Burger <i>et al.</i> 2014      |
|             |                |                |                 | <i>Rhipicephalus microplus</i> *  | KC503260  | 14,903 | Burger <i>et al.</i> 2014      |
|             |                |                |                 | <i>Rhipicephalus sanguineus</i>   | AF081829  | 14,710 | Shao <i>et al.</i> 2004        |
|             |                |                |                 | <i>Rhipicephalus simus</i> *      | KJ739594  | 14,929 | Xu <i>et al.</i> 2014          |
|             |                |                | Nuttalliellidae | <i>Nuttalliella namaqua</i>       | NC_019663 | 14,425 | Mans <i>et al.</i> 2012        |
|             | Mesostigmata   | Dermanyssoidea | Varroidae       | <i>Varroa destructor</i>          | AJ493124  | 16,476 | Navajas <i>et al.</i> 2002     |
|             |                | Phytoseioidea  | Phytoseiidae    | <i>Phytoseiulus persimilis</i>    | GQ222414  | 16,199 | Dermauw <i>et al.</i> 2010     |
|             |                |                |                 | <i>Metaseiulus occidentalis</i>   | EF221760  | 24,961 | Jeyaparakash and Hoy, 2007     |
|             |                | Rhodacaroidea  | Ologamasidae    | <i>Stylochyrus rarior</i>         | GQ927176  | 14,900 | Swafford and Bond 2009         |
| Acariformes | Trombidiformes | Cheyletoidea   | Demodicidae     | <i>Demodex brevis</i>             | KM114225  | 14,211 | Palopoli <i>et al.</i> 2014    |
|             |                |                |                 | <i>Demodex folliculorum</i>       | KM114226  | 14,150 | Palopoli <i>et al.</i> 2014    |
|             |                | Eriophyoidea   | Eriophyidae     | <i>Phyllocoptes taishanensis</i>  | KR604967  | 13,475 | This study                     |
|             |                |                |                 | <i>Eptrimerus sabinae</i>         | KR604966  | 13,531 | This study                     |
|             |                | Tetranychoidae | Tetranychidae   | <i>Panonychus citri</i>           | HM189212  | 13,077 | Yuan <i>et al.</i> 2010        |
|             |                |                |                 | <i>Panonychus ulmi</i>            | NC_012571 | 13,115 | Unpublished                    |
|             |                |                |                 | <i>Tetranychus truncates</i> *    | KM111296  | 13,089 | Chen <i>et al.</i> 2014        |
|             |                |                |                 | <i>Tetranychus urticae</i>        | NC_010526 | 13,103 | Van Leeuwen <i>et al.</i> 2008 |
|             |                |                |                 | <i>Tetranychus kanzawai</i>       | KJ729017  | 13,091 | Chen <i>et al.</i> 2014        |
|             |                |                |                 | <i>Tetranychus ludeni</i> *       | KJ729018  | 13,064 | Chen <i>et al.</i> 2014        |
|             |                |                |                 | <i>Tetranychus malaysiensis</i> * | KJ729019  | 13,049 | Chen <i>et al.</i> 2014        |
|             |                |                |                 | <i>Tetranychus phaseus</i> *      | KJ729020  | 13,084 | Chen <i>et al.</i> 2014        |
|             |                |                |                 | <i>Tetranychus pueraricola</i> *  | KJ729021  | 13,084 | Chen <i>et al.</i> 2014        |
|             |                |                |                 | <i>Tetranychus cinnabarinus</i> * | NC_014399 | 13,092 | Unpublished                    |
|             |                | Trombiculoidea | Trombiculidae   | <i>Leptotrombidium pallidum</i>   | AB180098  | 16,779 | Shao <i>et al.</i> 2005        |



---

|                |                 |                |                                       |           |        |                             |
|----------------|-----------------|----------------|---------------------------------------|-----------|--------|-----------------------------|
|                |                 |                | <i>Leptotrombidium akamushi</i>       | AB194045  | 13,698 | Shao <i>et al.</i> 2006     |
|                |                 |                | <i>Leptotrombidium deliense*</i>      | AB194044  | 13,731 | Shao <i>et al.</i> 2006     |
|                |                 |                | <i>Walchia hayashii</i>               | NC_010595 | 14,857 | Unpublished                 |
|                |                 |                | <i>Ascoschoengastia</i> sp.           | NC_010596 | 16,067 | Unpublished                 |
|                | Hygrobatoidae   | Unionicolidae  | <i>Unionicola foili</i>               | EU856396  | 14,738 | Ernsting <i>et al.</i> 2009 |
|                |                 |                | <i>Unionicola parkeri</i>             | HQ386015  | 14,734 | Edwards <i>et al.</i> 2011  |
| Sarcoptiformes | Acaroidea       | Acaridae       | <i>Aleuroglyphus ovatus</i>           | KC700022  | 14,328 | Sun <i>et al.</i> 2014      |
|                |                 |                | <i>Caloglyphus berlesei</i>           | KF499016  | 14,273 | Sun <i>et al.</i> 2014      |
|                | Analgoidea      | Pyroglyphidae  | <i>Dermatophagoides pteronyssinus</i> | EU884425  | 14,203 | Dermauw <i>et al.</i> 2009  |
|                |                 |                | <i>Dermatophagoides farinae</i>       | NC_013184 | 14,266 | Klimov & OConnor 2009       |
|                | Phthiracaroidae | Steganacaridae | <i>Steganacarus magnus</i>            | EU935607  | 13,818 | Domes <i>et al.</i> 2008    |
|                | Sarcoptoidea    | Psoroptidae    | <i>Psoroptes cuniculi</i>             | KJ957822  | 14,247 | Gu <i>et al.</i> 2014       |

---

Species with asterisk were deleted in the truncated Bayesian inference.

**Supplementary Table S4** Partition strategies used in this study.

| Date sets                                                    | Analysis methods | Number of partitions | Models and Partition scheme                                                                                                                                                                                                                                                                                                                                                                                                                                                                    |
|--------------------------------------------------------------|------------------|----------------------|------------------------------------------------------------------------------------------------------------------------------------------------------------------------------------------------------------------------------------------------------------------------------------------------------------------------------------------------------------------------------------------------------------------------------------------------------------------------------------------------|
| Amino acid                                                   | Bayesian         | 13                   | MTREV+I+G+F: Atp6, Atp8, Cob, Cox1, Cox2, Cox3, Nad1, Nad2, Nad3, Nad4, Nad4L, Nad5, Nad6                                                                                                                                                                                                                                                                                                                                                                                                      |
|                                                              | ML               | 13                   | MTREV: Atp6, Atp8, Cob, Cox1, Cox2, Cox3, Nad1, Nad2, Nad3, Nad4L, Nad5, Nad6<br>JTT: Nad4                                                                                                                                                                                                                                                                                                                                                                                                     |
| By genes                                                     | Bayesian         | 16                   | GTR+I+G: Atp6, Atp8, Cob, Cox1, Cox2, Cox3, Nad1, Nad2, Nad3, Nad4, Nad4L, Nad5, Nad6, 12S, 16S, tRNAs                                                                                                                                                                                                                                                                                                                                                                                         |
|                                                              | ML               | 16                   | GAMMAI: Atp6, Atp8, Cob, Cox1, Cox2, Cox3, Nad1, Nad2, Nad3, Nad4, Nad4L, Nad5, Nad6, 12S, 16S, tRNAs                                                                                                                                                                                                                                                                                                                                                                                          |
| By genes, exclude third codon                                | Bayesian         | 16                   | GTR+I+G: Atp6, Atp8, Cob, Cox1, Cox2, Cox3, Nad1, Nad2, Nad3, Nad4, Nad4L, Nad5, Nad6, 12S, 16S, tRNAs                                                                                                                                                                                                                                                                                                                                                                                         |
|                                                              | ML               | 16                   | GAMMAI: Atp6, Atp8, Cob, Cox1, Cox2, Cox3, Nad1, Nad2, Nad3, Nad4, Nad4L, Nad5, Nad6, 12S, 16S, tRNAs                                                                                                                                                                                                                                                                                                                                                                                          |
| By codon                                                     | Bayesian         | 6                    | GTR+I+G: 1 <sup>st</sup> codon, 2 <sup>nd</sup> codon, 3 <sup>rd</sup> codon, <i>rrnS</i> , <i>rrnL</i> , tRNAs                                                                                                                                                                                                                                                                                                                                                                                |
|                                                              | ML               | 6                    | GAMMAI: 1 <sup>st</sup> codon, 2 <sup>nd</sup> codon, 3 <sup>rd</sup> codon, 12S, 16S, tRNAs                                                                                                                                                                                                                                                                                                                                                                                                   |
| By codon, exclude third codon                                | Bayesian         | 5                    | GTR+I+G: 1 <sup>st</sup> codon, 2 <sup>nd</sup> codon, 12S, 16S, tRNAs                                                                                                                                                                                                                                                                                                                                                                                                                         |
|                                                              | ML               | 5                    | GAMMAI: 1 <sup>st</sup> codon, 2 <sup>nd</sup> codon, 12S, 16S, tRNAs                                                                                                                                                                                                                                                                                                                                                                                                                          |
| Nucleotide sequences by PartitionFinder                      | Bayesian         | 8                    | GTR+I+G: (Atp6_pos1, Cob_pos1, Cox1_pos1, Cox2_pos1, Cox3_pos1, Nad3_pos1), (Atp6_pos2, Cob_pos2, Cox1_pos2, Cox2_pos2, Cox3_pos2, Nad1_pos2, Nad2_pos2, Nad3_pos2, Nad4L_pos2, Nad5_pos2, Nad6_pos2), (Atp8_pos1, Atp8_pos2, Nad1_pos1, Nad2_pos1, Nad4L_pos1, Nad5_pos1, Nad6_pos1), (Nad4_pos1, Nad4_pos2)<br>GTR+G: (Atp6_pos3, Atp8_pos3, Cob_pos3, Cox1_pos3, Cox2_pos3, Cox3_pos3, Nad2_pos3, Nad3_pos3, Nad6_pos3), (Nad1_pos3, Nad4L_pos3, Nad4_pos3, Nad5_pos3), (12S, 16S), (tRNAs) |
| Nucleotide sequences by PartitionFinder, with truncated taxa | Bayesian         | 8                    | GTR+I+G: (Atp6_pos1, Cob_pos1, Cox1_pos1, Cox2_pos1, Cox3_pos1, Nad3_pos1), (Atp6_pos2, Cob_pos2, Cox1_pos2, Cox2_pos2, Cox3_pos2, Nad1_pos2, Nad2_pos2, Nad3_pos2, Nad4L_pos2, Nad5_pos2, Nad6_pos2), (Atp8_pos1, Atp8_pos2, Nad1_pos1, Nad2_pos1, Nad4L_pos1, Nad5_pos1,                                                                                                                                                                                                                     |

---

|                                                          |          |   |                                                                                                                                                                                                                                                                                                                                                                                                                                                                                                                                                                                                                                                                                                                                                                     |
|----------------------------------------------------------|----------|---|---------------------------------------------------------------------------------------------------------------------------------------------------------------------------------------------------------------------------------------------------------------------------------------------------------------------------------------------------------------------------------------------------------------------------------------------------------------------------------------------------------------------------------------------------------------------------------------------------------------------------------------------------------------------------------------------------------------------------------------------------------------------|
| Nucleotide<br>sequences of<br>PCGs by<br>PartitionFinder | Bayesian | 6 | <p>Nad6_pos1), (Nad4_pos1, Nad4_pos2)</p> <p>GTR+G: (Atp6_pos3, Atp8_pos3, Cob_pos3,<br/>Cox1_pos3, Cox2_pos3, Cox3_pos3, Nad2_pos3,<br/>Nad3_pos3, Nad6_pos3), (Nad1_pos3, Nad4L_pos3,<br/>Nad4_pos3, Nad5_pos3), (12S, 16S), (tRNAs)</p> <p>GTR+I+G: (Atp6_pos1, Cob_pos1, Cox1_pos1,<br/>Cox2_pos1, Cox3_pos1, Nad3_pos1), (Atp6_pos2,<br/>Cob_pos2, Cox1_pos2, Cox2_pos2, Cox3_pos2,<br/>Nad1_pos2, Nad2_pos2, Nad3_pos2, Nad4L_pos2,<br/>Nad5_pos2, Nad6_pos2), (Atp8_pos1, Atp8_pos2,<br/>Nad1_pos1, Nad2_pos1, Nad4L_pos1, Nad5_pos1,<br/>Nad6_pos1), (Nad4_pos1, Nad4_pos2)</p> <p>GTR+G: (Atp6_pos3, Atp8_pos3, Cob_pos3,<br/>Cox1_pos3, Cox2_pos3, Cox3_pos3, Nad2_pos3,<br/>Nad3_pos3, Nad6_pos3), (Nad1_pos3, Nad4L_pos3,<br/>Nad4_pos3, Nad5_pos3)</p> |
|                                                          |          |   |                                                                                                                                                                                                                                                                                                                                                                                                                                                                                                                                                                                                                                                                                                                                                                     |
|                                                          |          |   |                                                                                                                                                                                                                                                                                                                                                                                                                                                                                                                                                                                                                                                                                                                                                                     |

---

**Supplementary Table S5** Inferred second structure of *trnC*, *trnY* and *trnV* of *Dermatophagoides pteronyssinus*.

| tRNA        | AA-arm         | D-arm                   | AC-arm     | V-loop                     | T-arm  | AA-arm                |
|-------------|----------------|-------------------------|------------|----------------------------|--------|-----------------------|
| <i>trnC</i> | <u>ATCTCTT</u> | AA <u>GTTTTAAAAATAC</u> | A          | <u>TTAGATTGCA</u> AATCTAA  | AATTTT | <u>AAGAGGTT</u>       |
| <i>trnY</i> | <u>AGACTTT</u> |                         | TAAT       | <u>GAAAGCTGTA</u> AACTTTC  | TTTT   | <u>TTGTGCTATTATGG</u> |
| <i>trnV</i> | <u>TTAAGAG</u> |                         | TTTCATTATT | <u>TTTTGCTTACA</u> AAACAAA | AATC   | <u>CTCTCTG</u>        |
